# Supplementary material for: Modelling armed conflict risk under climate change with machine learning and time-series data
Source: PubMed Central journal article supplement (PMC9123163; doi:10.1038/s41467-022-30356-x), 2022-05-20
Supplement: 41467_2022_30356_MOESM1_ESM.pdf [file 41467_2022_30356_MOESM1_ESM.pdf]

# Supplementary Information

For

## Modelling armed conflict risk under climate change with machine learning and high-frequency time-series data

Quansheng Ge<sup>1,8</sup>, Mengmeng Hao<sup>1,2,8</sup>, Fangyu Ding<sup>1,2,\*</sup>, Dong Jiang<sup>1,2,3,\*</sup>, Jürgen Scheffran<sup>4</sup>, David Helman<sup>5,6</sup>, Tobias Ide<sup>7</sup>

<sup>1</sup>Institute of Geographic Sciences and Natural Resources Research, Chinese Academy of Sciences, Beijing 100101, China.

<sup>2</sup>College of Resources and Environment, University of Chinese Academy of Sciences, Beijing 100049, China.

<sup>3</sup>Key Laboratory of Carrying Capacity Assessment for Resource and Environment, Ministry of Land & Resources, Beijing 100101, China.

<sup>4</sup>Institute of Geography, Center for Earth System Research and Sustainability, University of Hamburg, Hamburg 20144, Germany.

<sup>5</sup>Institute of Environmental Sciences, Department of Soil and Water Sciences, The Robert H. Smith Faculty of Agriculture, Food & Environment, The Hebrew University of Jerusalem, Rehovot 7610001, Israel.

<sup>6</sup>Advanced School for Environmental Studies, The Hebrew University of Jerusalem, Jerusalem, Israel.

<sup>7</sup>Centre for Biosecurity and One Health, Harry Butler Institute, Murdoch University, Murdoch 6150, Perth, Australia.

<sup>8</sup>These authors contribute equally: Quansheng Ge, Mengmeng Hao.

\*Correspondence and requests for materials should be addressed to: Fangyu Ding (dingfy.17b@igsnr.ac.cn) and Dong Jiang (jiangd@igsnr.ac.cn)

## Content

|    |                                |    |
|----|--------------------------------|----|
| 26 |                                |    |
| 27 | Supplementary Figures .....    | 3  |
| 28 | Supplementary Tables .....     | 20 |
| 29 | Supplementary Notes .....      | 23 |
| 30 | Dependent Variable .....       | 23 |
| 31 | Independent Variable .....     | 24 |
| 32 | Supplementary Methods .....    | 25 |
| 33 | Boosted Regression Trees ..... | 25 |
| 34 | BRT Parameter Selection .....  | 26 |
| 35 | Modelling Strategy.....        | 26 |
| 36 | Statistical Test .....         | 27 |
| 37 | Supplementary References.....  | 34 |
| 38 |                                |    |

39 **Supplementary Figures**

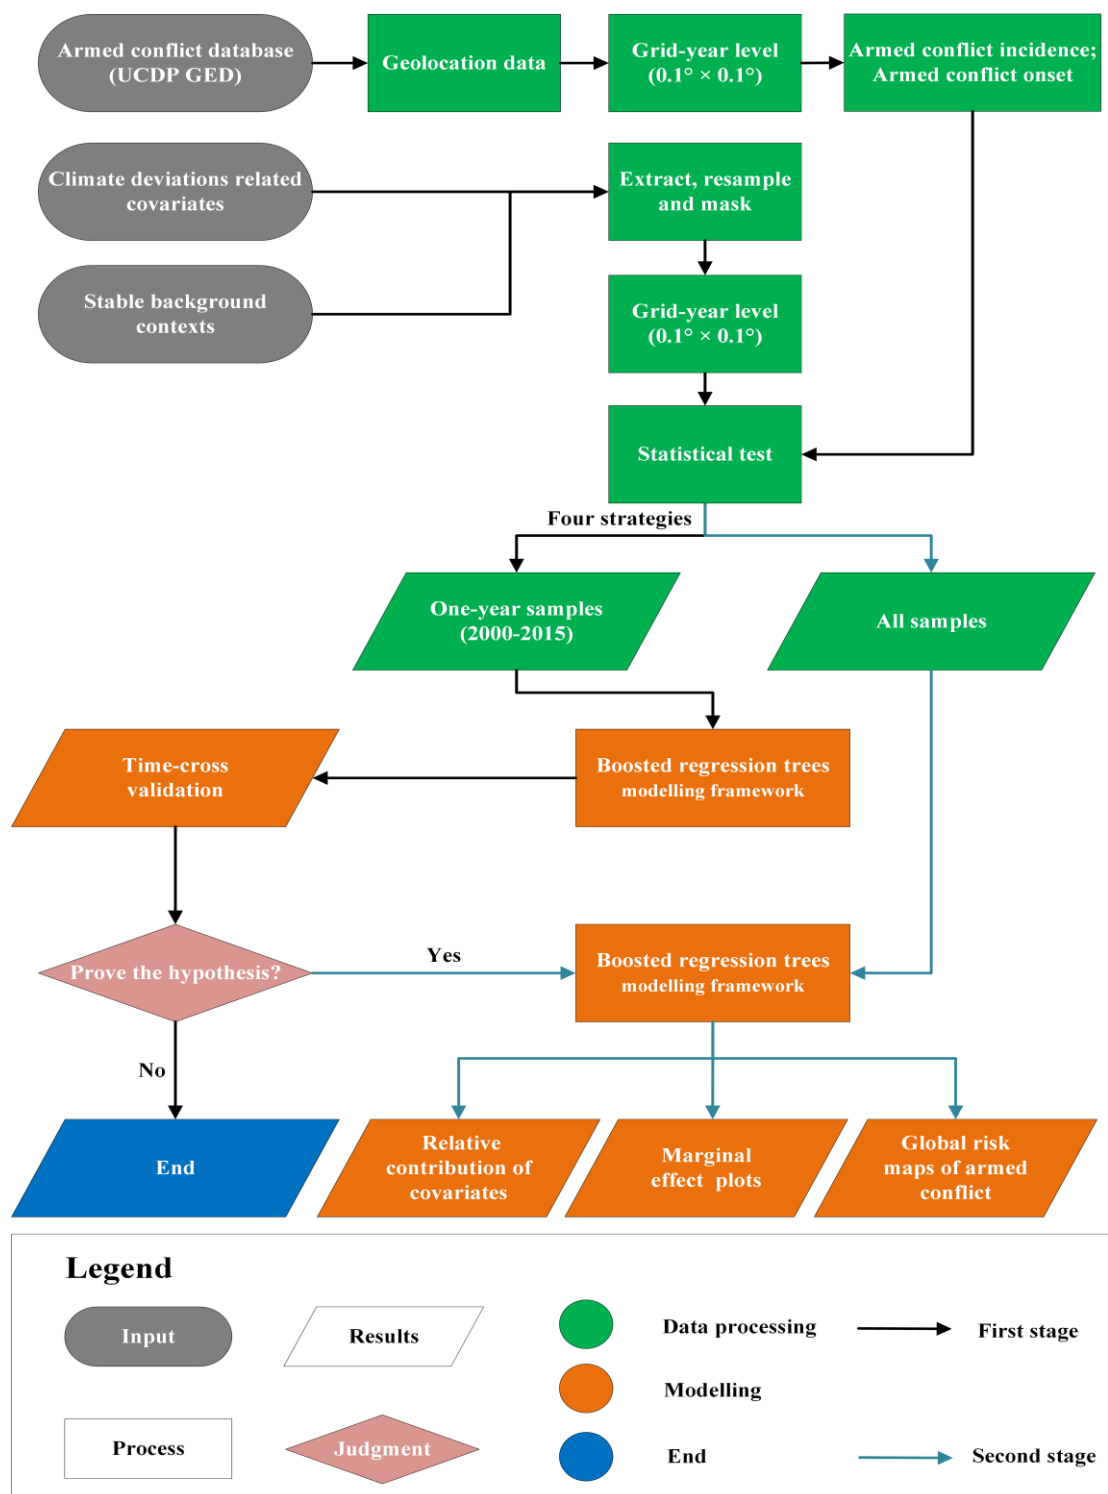

40  
 41 **Supplementary Figure 1. Analytic process overview.** The process used to simulate the risk of  
 42 armed conflict at global scale involved two stages. In the first stage (black arrow), the input dataset  
 43 was combined with the BRT modelling framework to prove the hypothesis. If the hypothesis was  
 44 proved to be true, the second stage (blue arrow) would start the analysis. Otherwise the analytic  
 45 process would end.

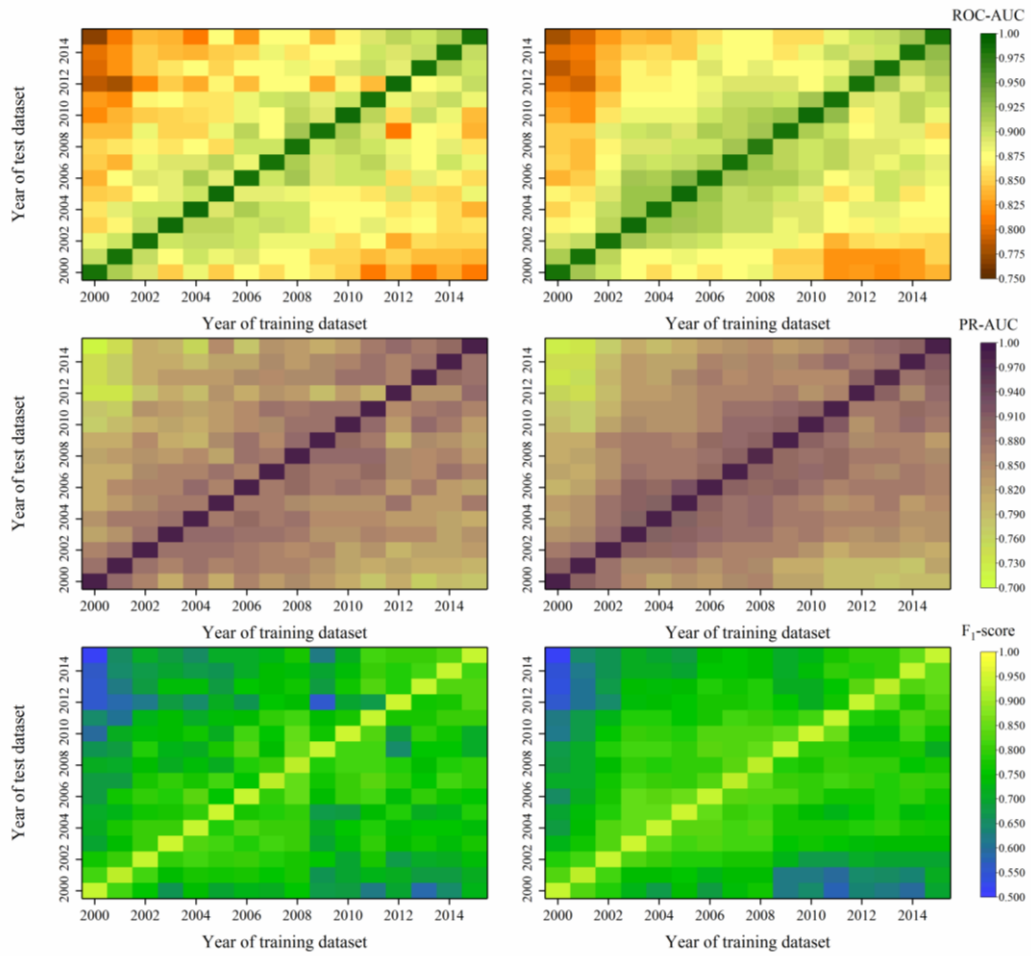

46

47 **Supplementary Figure 2. Validation performance on a time scale of the BRT models trained**  
 48 **on one-year incidence samples.** Validation performance of strategies a and a+ are shown in the left  
 49 and right columns, respectively.

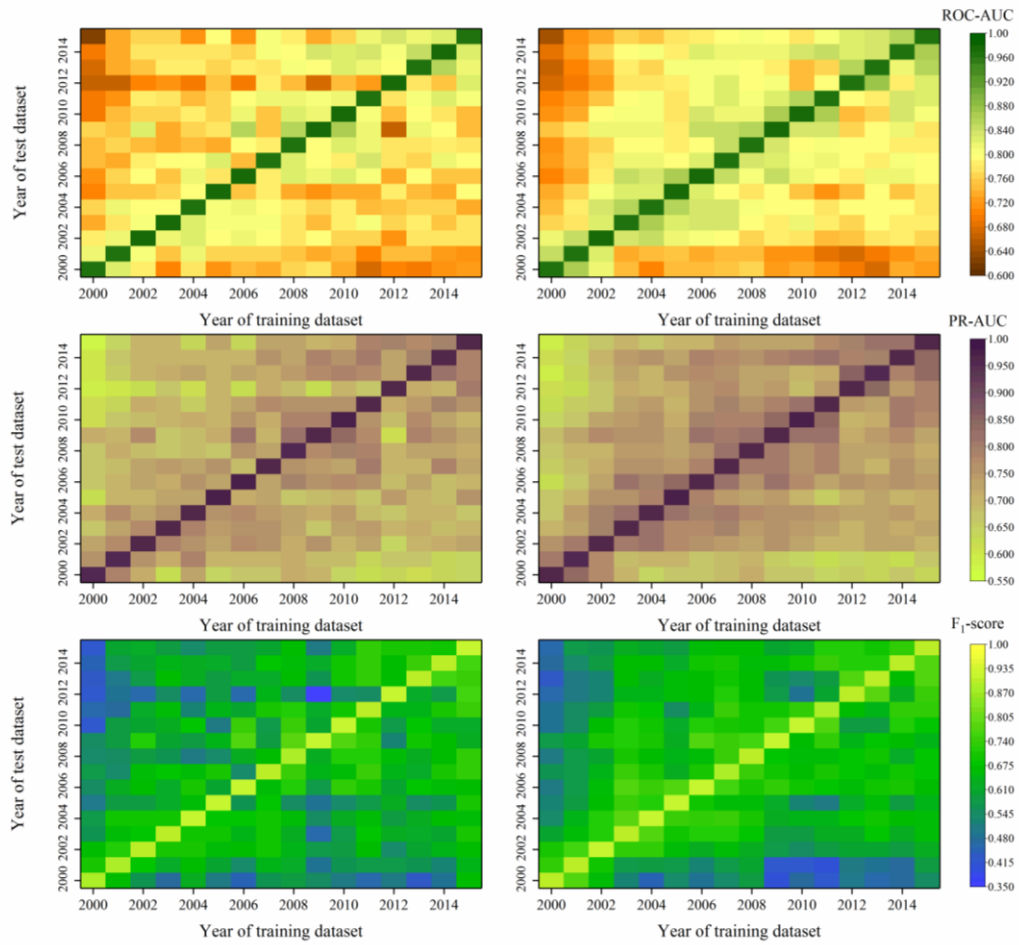

50  
 51  
 52  
 53  
 54

**Supplementary Figure 3. Validation performance on a time scale of the BRT models trained on one-year incidence samples.** Validation performance of strategies b and b+ are shown in the left and right columns, respectively.

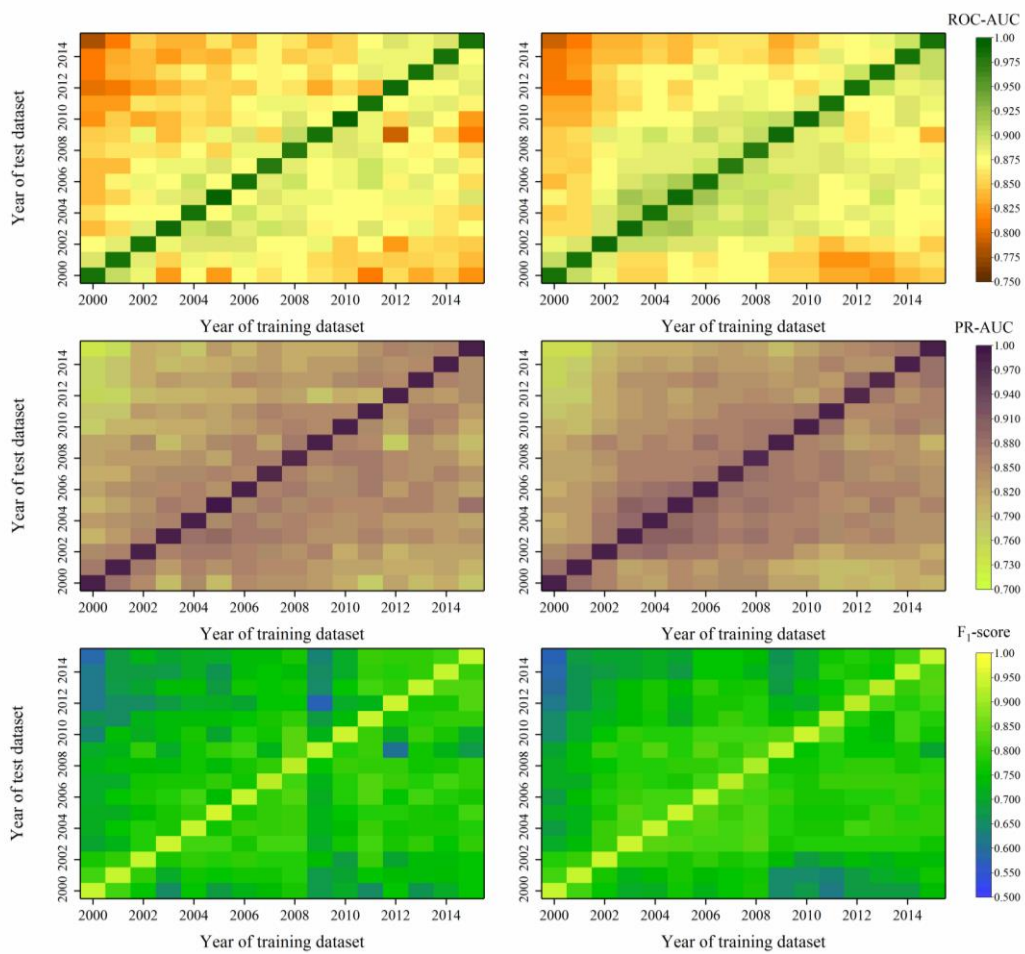

55

56 **Supplementary Figure 4. Validation performance on a time scale of the BRT models trained**

57 **on one-year onset samples.** Validation performance of strategies a and a+ are shown in the left

58 and right columns, respectively.

59

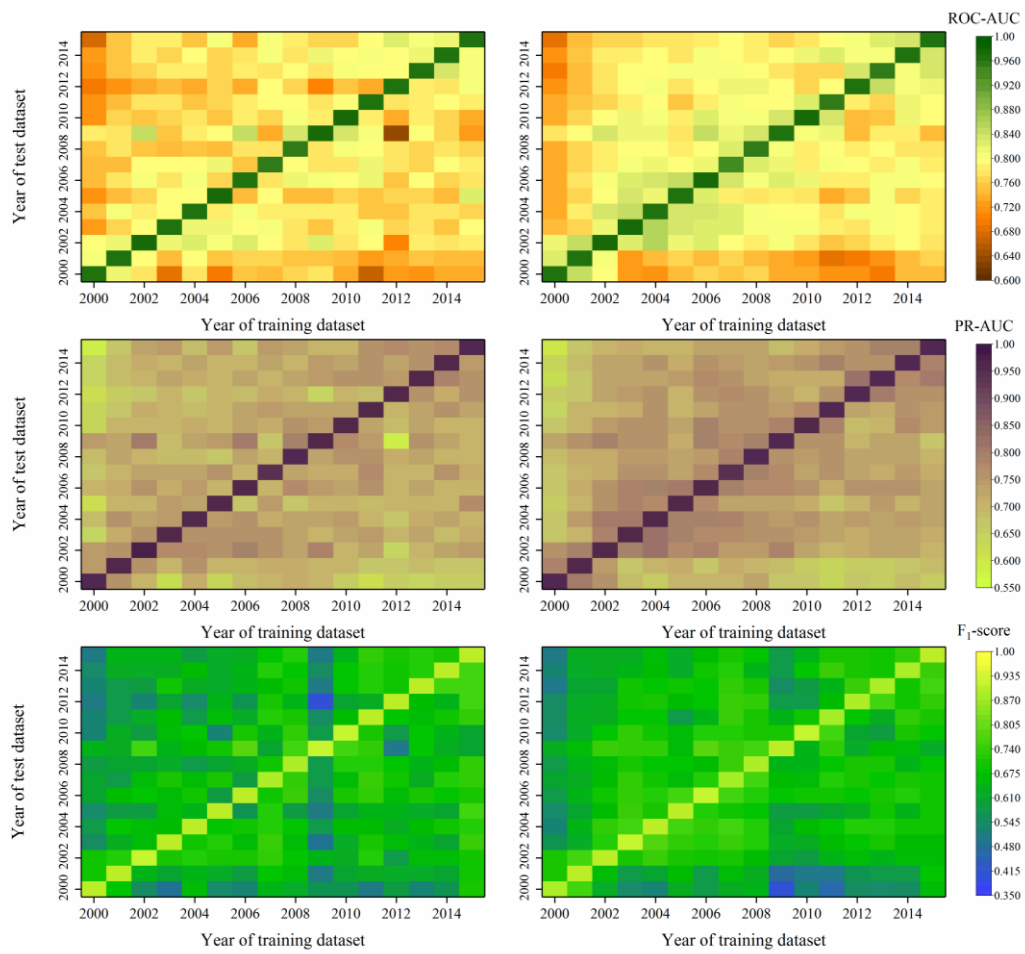

60

61 **Supplementary Figure 5. Validation performance on a time scale of the BRT models trained**

62 **on one-year onset samples.** Validation performance of strategies b and b+ are shown in the left

63 and right columns, respectively.

64

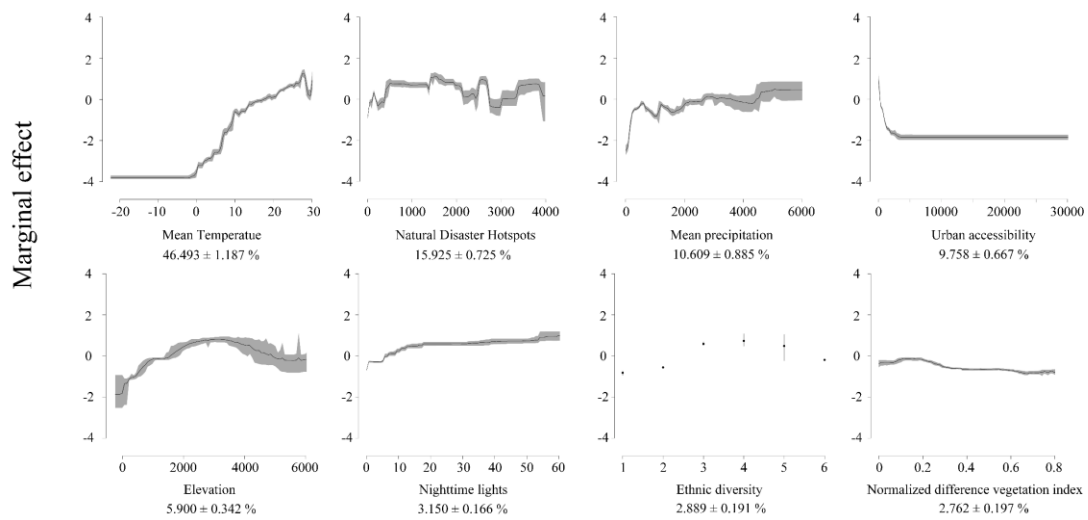

65

66 **Supplementary Figure 6. Marginal effect curves of each stable background covariate over the**  
 67 **BRT ensembles fitted to the full incidence samples under strategy a+.** The black lines represent  
 68 the mean effect curves calculated from the ensemble BRT models and the dark grey the 95%  
 69 confidence interval. Sub-plots are ordered by the mean relative contribution (%) of covariates, with  
 70 these mean relative contribution  $\pm$  standard deviation (%) given within each sub-plot.

71

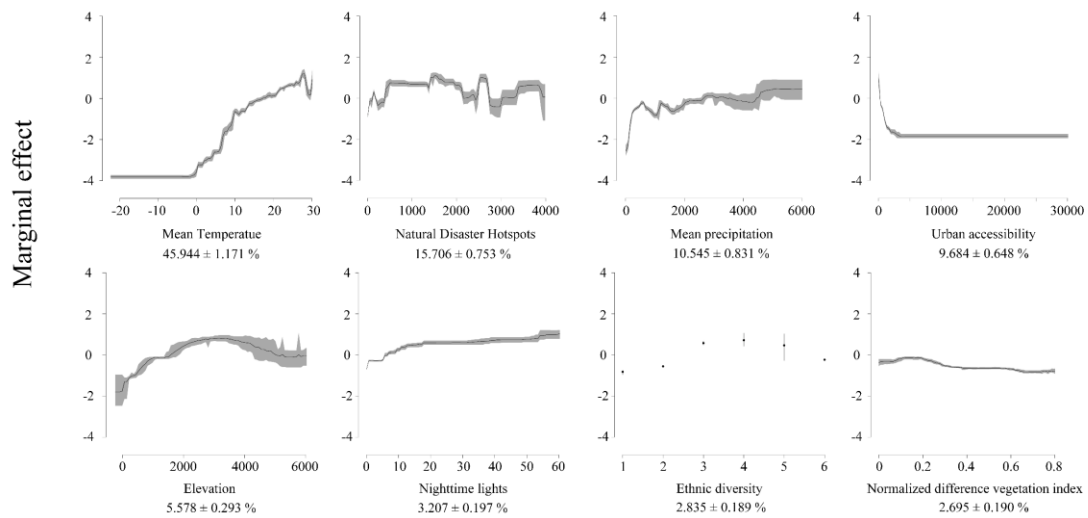

72

73 **Supplementary Figure 7. Marginal effect curves of each stable background covariate over the**  
 74 **BRT ensembles fitted to the full incidence samples under strategy a.** The black lines represent  
 75 the mean effect curves calculated from the ensemble BRT models and the dark grey the 95%  
 76 confidence interval. Sub-plots are ordered by the mean relative contribution (%) of covariates, with  
 77 these mean relative contribution  $\pm$  standard deviation (%) given within each sub-plot.



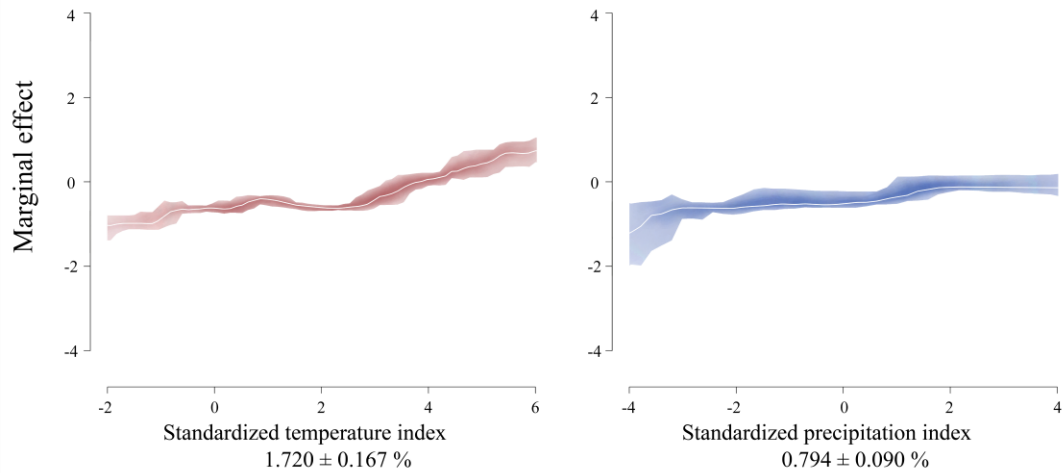

78

79 **Supplementary Figure 8. Marginal effect curves of each climate deviations related covariate**  
 80 **over the BRT ensembles fitted to the full incidence samples under strategy a.** The white lines  
 81 represent the mean effect curves calculated from the ensemble BRT models. 95% confidence  
 82 interval of climate variables are indicated by color: red, standardized temperature index; blue,  
 83 Standardized precipitation index. Sub-plots are ordered by the mean relative contribution (%) of  
 84 covariates, with these mean relative contribution  $\pm$  standard deviation (%) given within each sub-  
 85 plot.  
 86

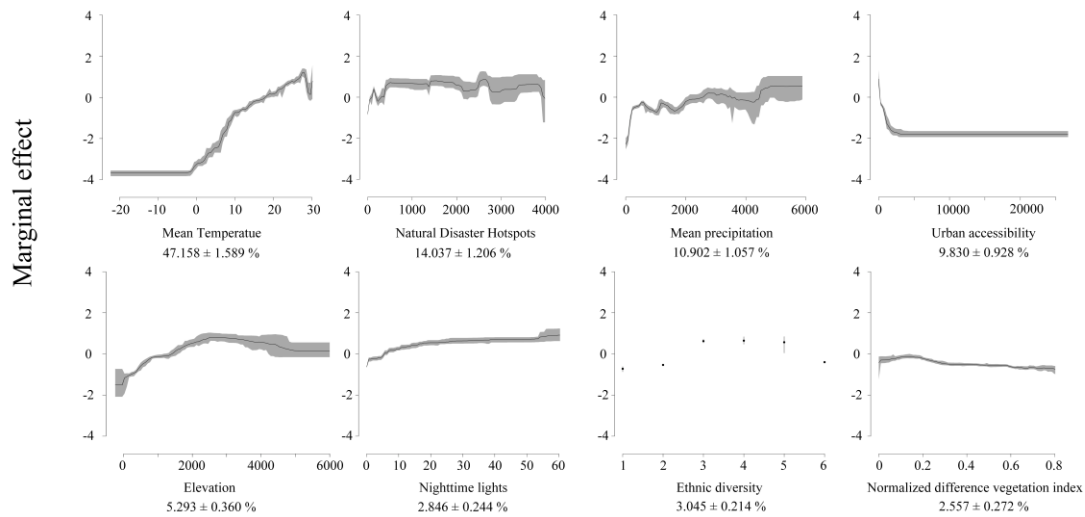

87

88 **Supplementary Figure 9. Marginal effect curves of each stable background covariate over the**  
 89 **BRT ensembles fitted to the full onset samples under strategy a+.** The black lines represent the  
 90 mean effect curves calculated from the ensemble BRT models and the dark grey the 95% confidence  
 91 interval. Sub-plots are ordered by the mean relative contribution (%) of covariates, with these mean  
 92 relative contribution  $\pm$  standard deviation (%) given within each sub-plot.  
 93

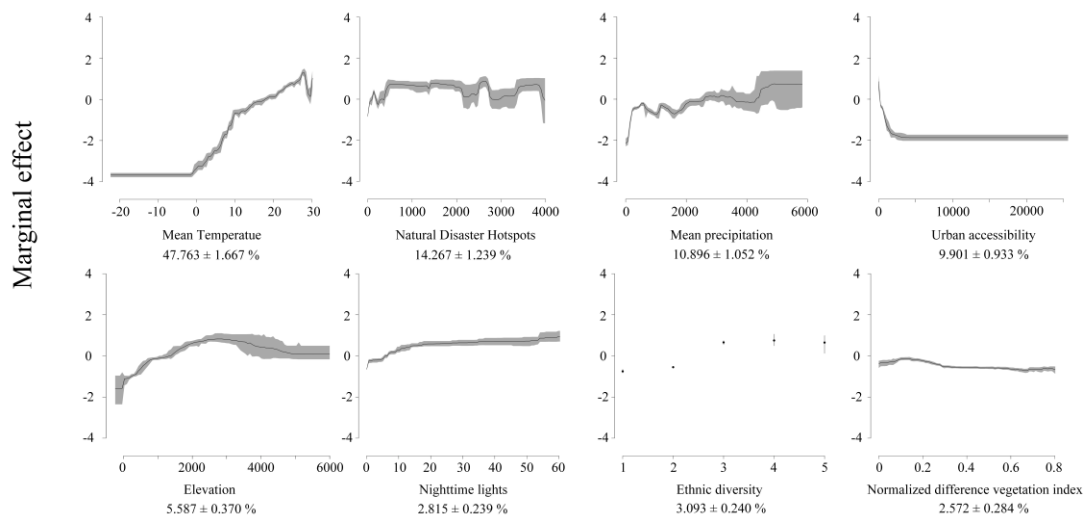

94

95 **Supplementary Figure 10. Marginal effect curves of each stable background covariate over**  
 96 **the BRT ensembles fitted to the full onset samples under strategy a.** The black lines represent  
 97 the mean effect curves calculated from the ensemble BRT models and the dark grey the 95%  
 98 confidence interval. Sub-plots are ordered by the mean relative contribution (%) of covariates, with  
 99 these mean relative contribution  $\pm$  standard deviation (%) given within each sub-plot.

100

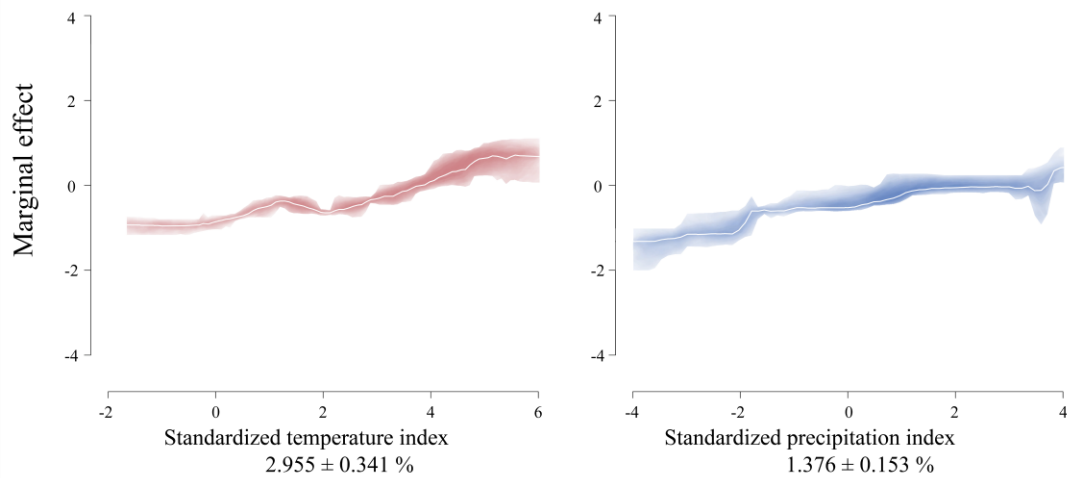

101

102 **Supplementary Figure 11. Marginal effect curves of each climate deviation related covariate**  
 103 **over the BRT ensembles fitted to the full onset samples under strategy a+.** The white lines  
 104 represent the mean effect curves calculated from the ensemble BRT models. 95% confidence  
 105 interval of climate variables are indicated by color: red, standardized temperature index; blue,  
 106 Standardized precipitation index. Sub-plots are ordered by the mean relative contribution (%) of  
 107 covariates, with these mean relative contribution  $\pm$  standard deviation (%) given within each sub-  
 108 plot.

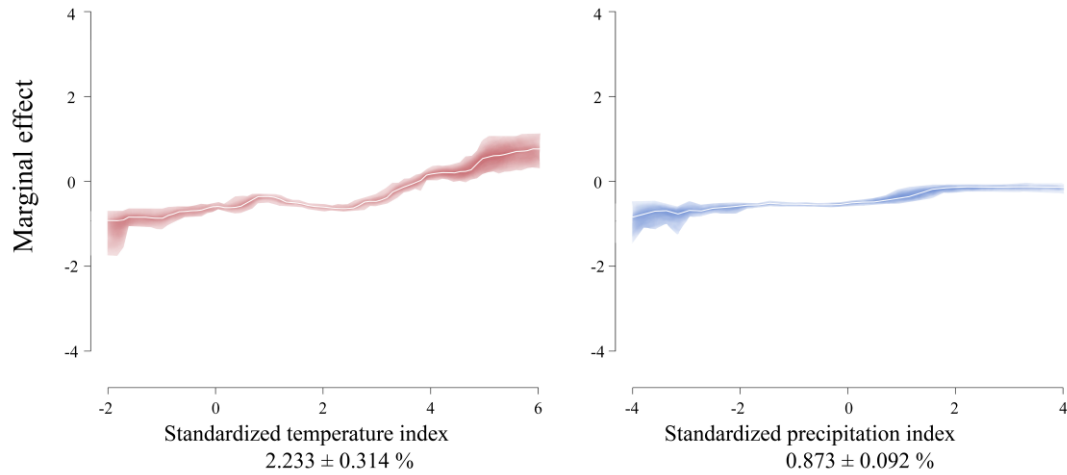

109  
110  
111  
112  
113  
114  
115  
116  
117

**Supplementary Figure 12. Marginal effect curves of each climate deviation related covariate over the BRT ensembles fitted to the full onset samples under strategy a.** The white lines represent the mean effect curves calculated from the ensemble BRT models. 95% confidence interval of climate variables are indicated by color: red, standardized temperature index; blue, Standardized precipitation index. Sub-plots are ordered by the mean relative contribution (%) of covariates, with these mean relative contribution  $\pm$  standard deviation (%) given within each sub-plot.

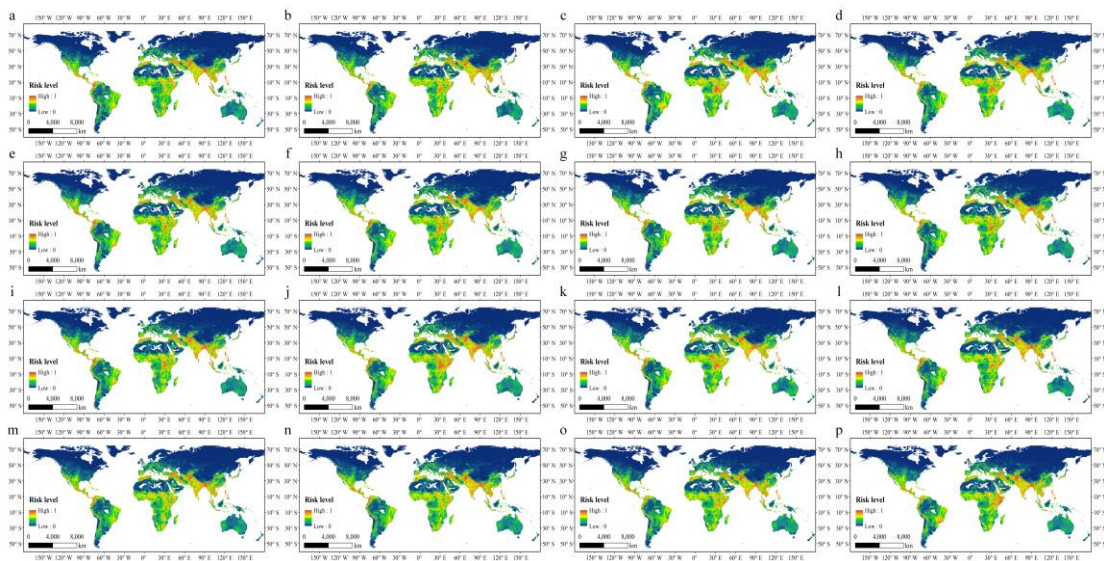

118  
119  
120  
121  
122

**Supplementary Figure 13. Maps of the global simulated risk of armed conflict incidence at  $0.1^\circ \times 0.1^\circ$  spatial resolution based on 20 ensemble BRT models trained on all incidence samples under strategy a.** The simulated risk level ranges from 0 (blue) to 1 (red).

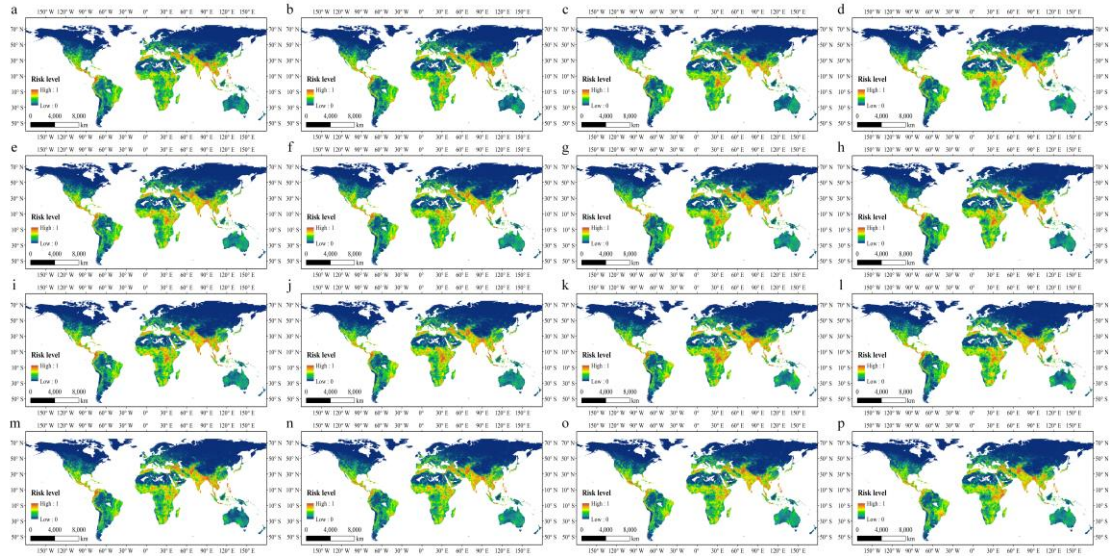

123  
124  
125  
126  
127

**Supplementary Figure 14. Maps of the global simulated risk of armed conflict incidence at  $0.1^\circ \times 0.1^\circ$  spatial resolution based on 20 ensemble BRT models trained on all incidence samples under strategy a+. The simulated risk level ranges from 0 (blue) to 1 (red).**

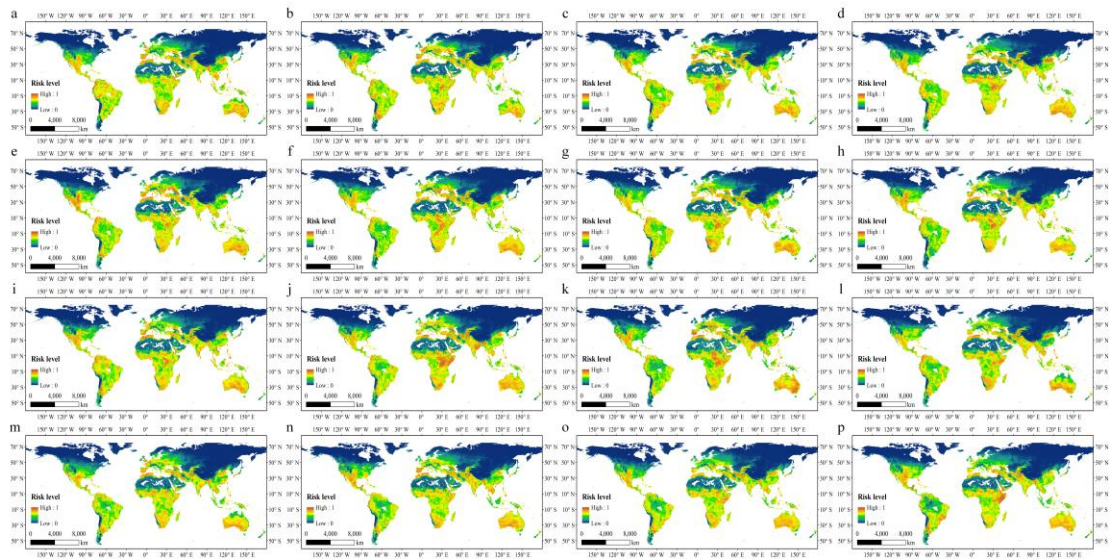

128  
129  
130  
131  
132

**Supplementary Figure 15. Maps of the global simulated risk of armed conflict incidence at  $0.1^\circ \times 0.1^\circ$  spatial resolution based on 20 ensemble BRT models trained on all incidence samples under strategy b. The simulated risk level ranges from 0 (blue) to 1 (red).**

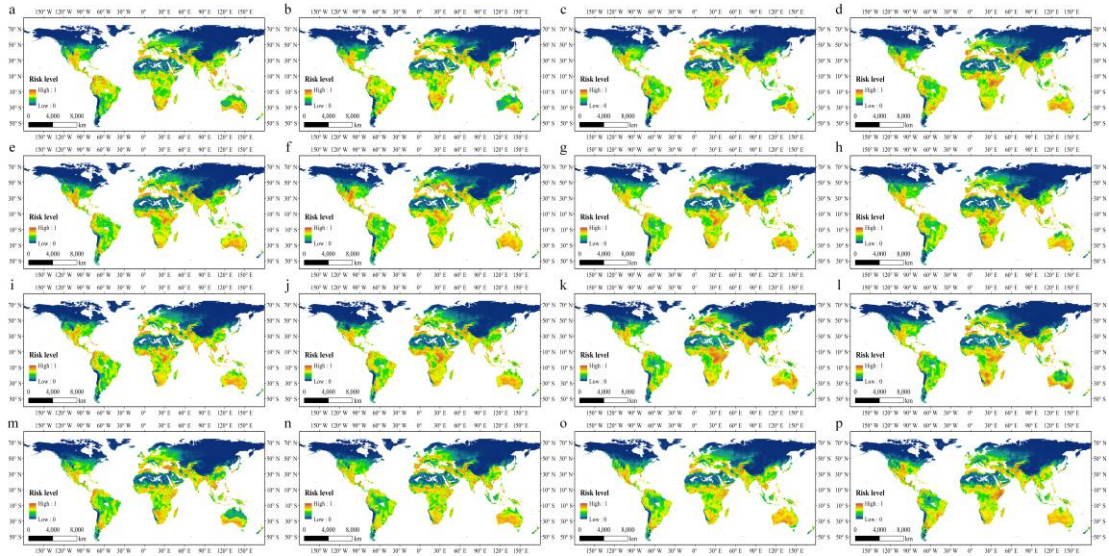

133  
134  
135  
136  
137

**Supplementary Figure 16. Maps of the global simulated risk of armed conflict incidence at  $0.1^\circ \times 0.1^\circ$  spatial resolution based on 20 ensemble BRT models trained on all incidence samples under strategy b+. The simulated risk level ranges from 0 (blue) to 1 (red).**

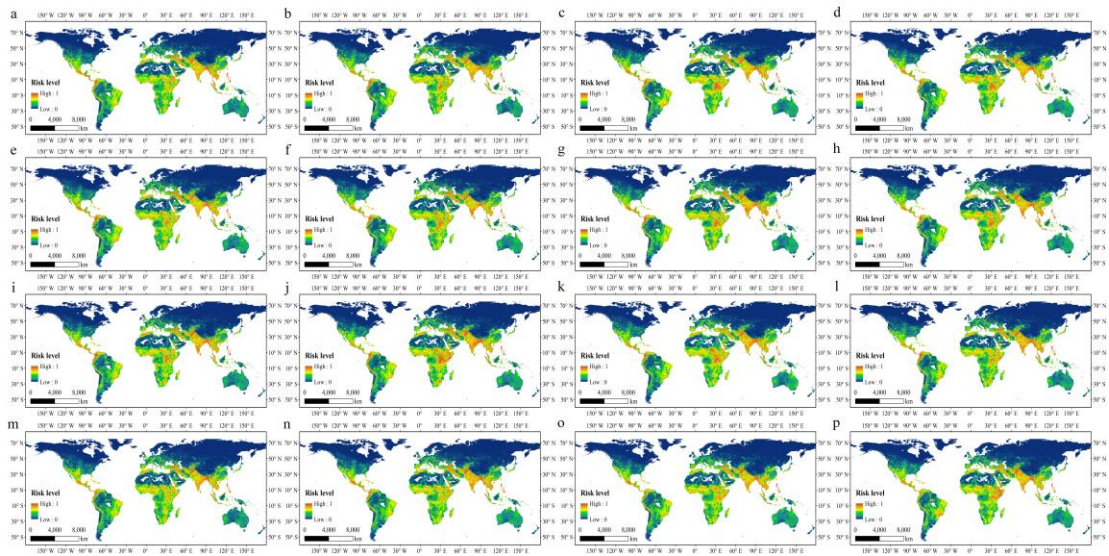

138  
139  
140  
141  
142

**Supplementary Figure 17. Maps of the global simulated risk of armed conflict onset at  $0.1^\circ \times 0.1^\circ$  spatial resolution based on 20 ensemble BRT models trained on all onset samples under strategy a. The simulated risk level ranges from 0 (blue) to 1 (red).**

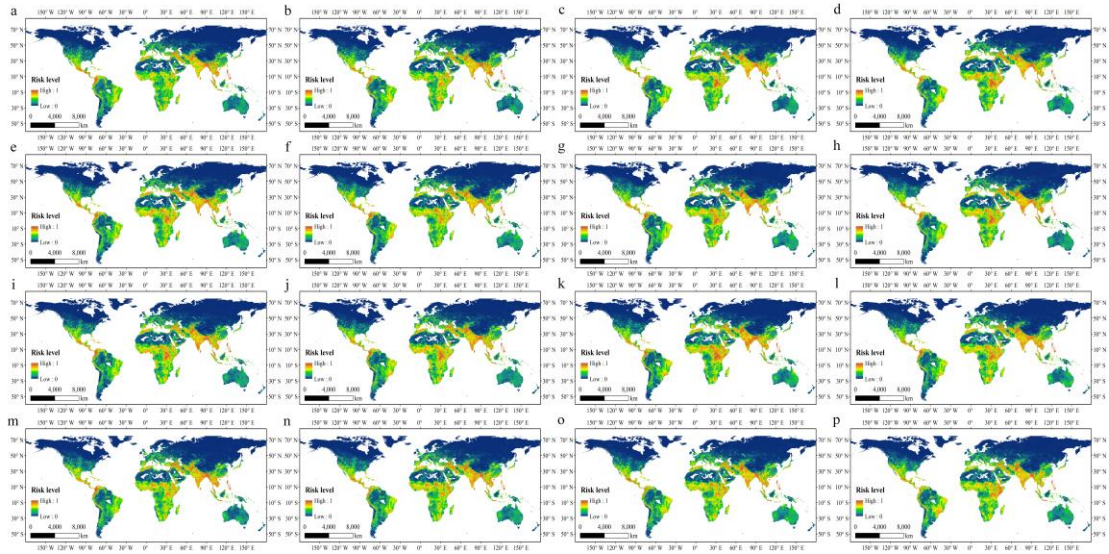

143  
144  
145  
146  
147

**Supplementary Figure 18. Maps of the global simulated risk of armed conflict onset at  $0.1^\circ \times 0.1^\circ$  spatial resolution based on 20 ensemble BRT models trained on all onset samples under strategy a+.** The simulated risk level ranges from 0 (blue) to 1 (red).

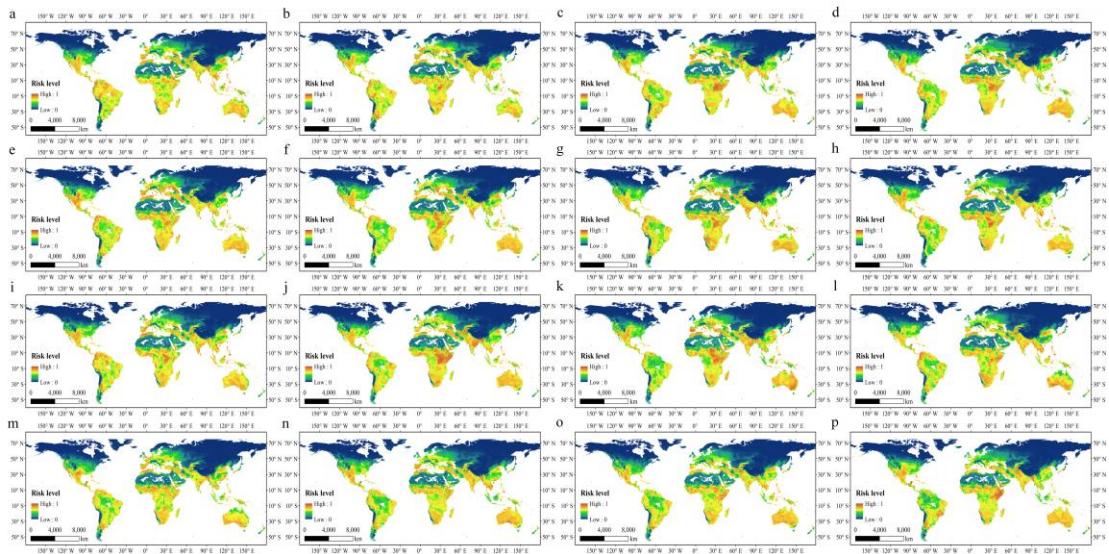

148  
149  
150  
151  
152

**Supplementary Figure 19. Maps of the global simulated risk of armed conflict onset at  $0.1^\circ \times 0.1^\circ$  spatial resolution based on 20 ensemble BRT models trained on all onset samples under strategy b.** The simulated risk level ranges from 0 (blue) to 1 (red).

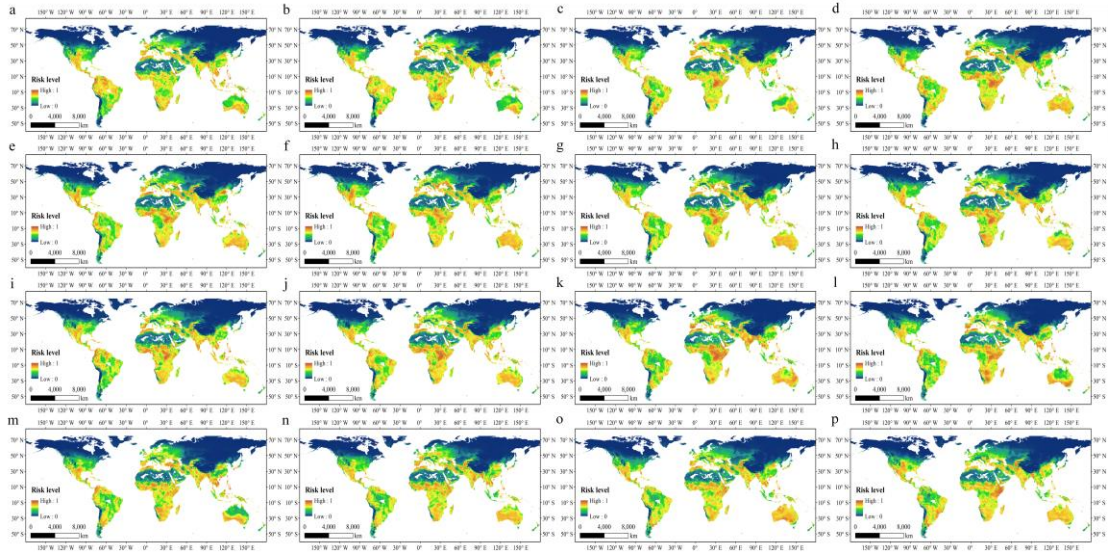

153  
154  
155  
156  
157

**Supplementary Figure 20. Maps of the global simulated risk of armed conflict onset at  $0.1^\circ \times 0.1^\circ$  spatial resolution based on 20 ensemble BRT models trained on all onset samples under strategy b+. The simulated risk level ranges from 0 (blue) to 1 (red).**

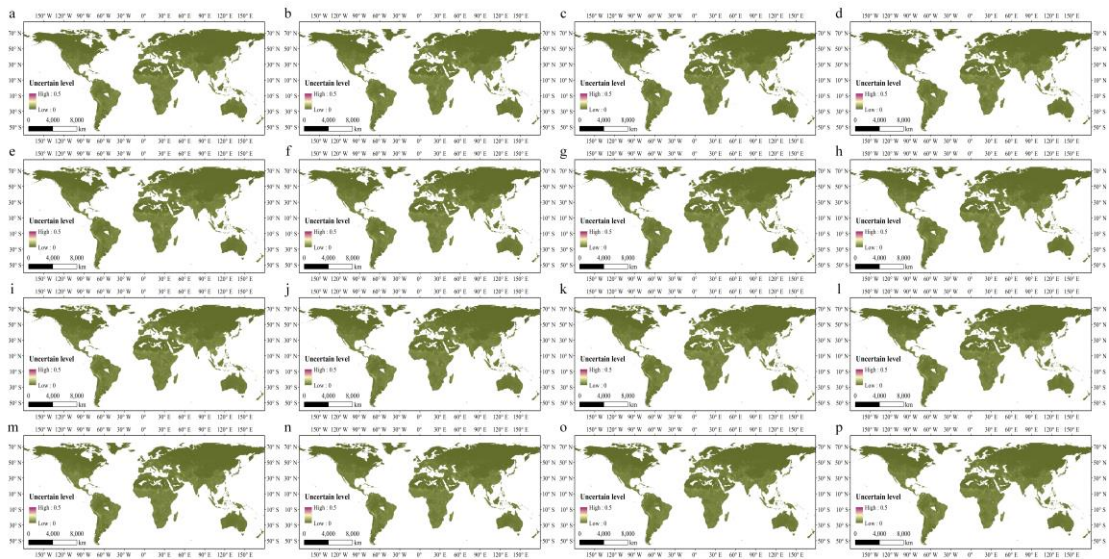

158  
159  
160  
161

**Supplementary Figure 21. Maps of uncertainty associated with these simulations derived from 20 ensemble BRT models trained on all incidence samples under strategy a.**

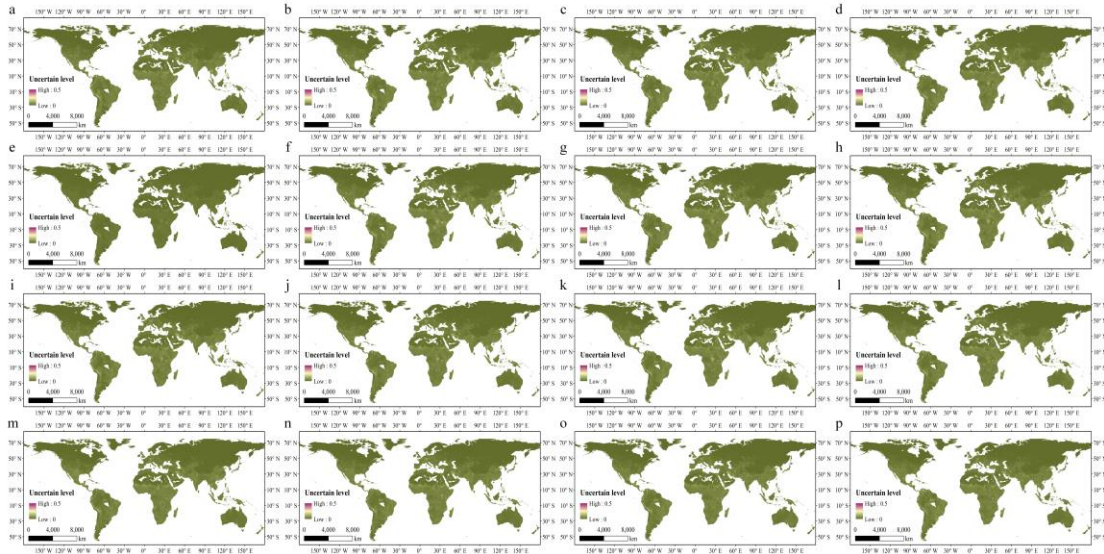

162

163

**Supplementary Figure 22. Maps of uncertainty associated with these simulations derived from 20 ensemble BRT models trained on all incidence samples under strategy a+.**

164

165

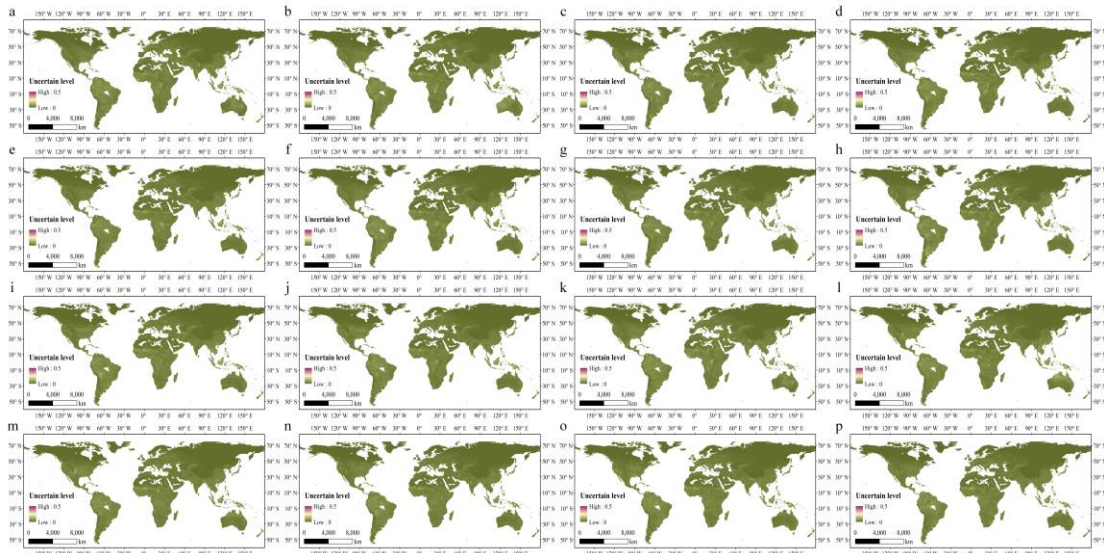

166

167

**Supplementary Figure 23. Maps of uncertainty associated with these simulations derived from 20 ensemble BRT models trained on all incidence samples under strategy b.**

168

169



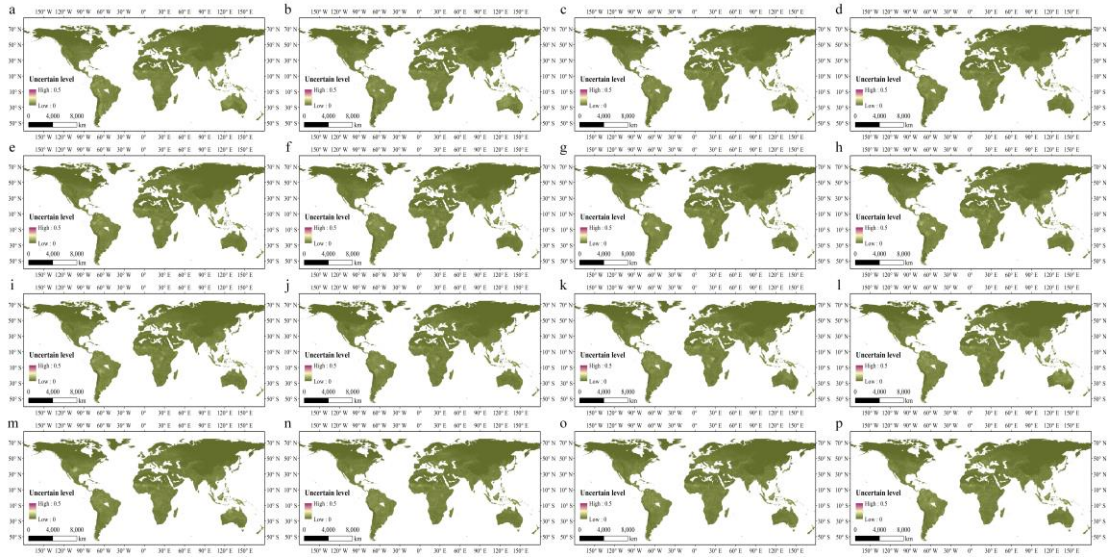

170

171

**Supplementary Figure 24. Maps of uncertainty associated with these simulations derived from 20 ensemble BRT models trained on all incidence samples under strategy b-.**

172

173

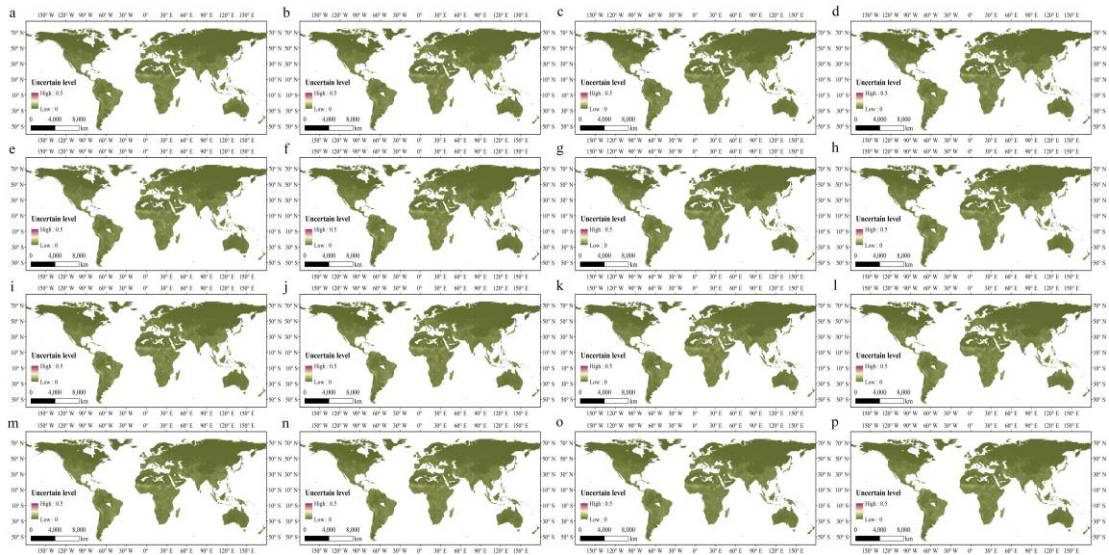

174

175

**Supplementary Figure 25. Maps of uncertainty associated with these simulations derived from 20 ensemble BRT models trained on all onset samples under strategy a.**

176

177

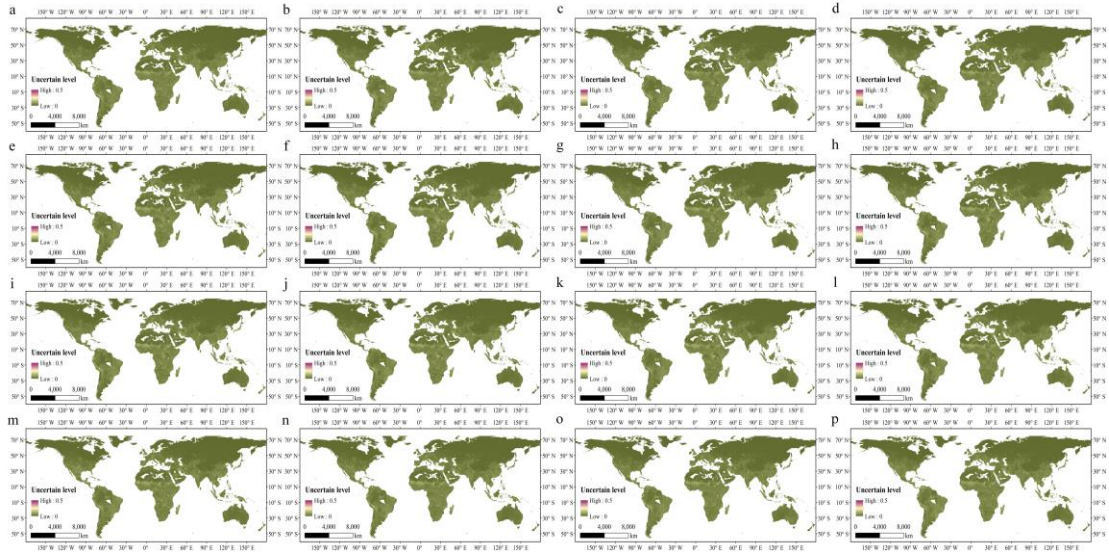

178

179

**Supplementary Figure 26. Maps of uncertainty associated with these simulations derived from 20 ensemble BRT models trained on all onset samples under strategy a+.**

180

181

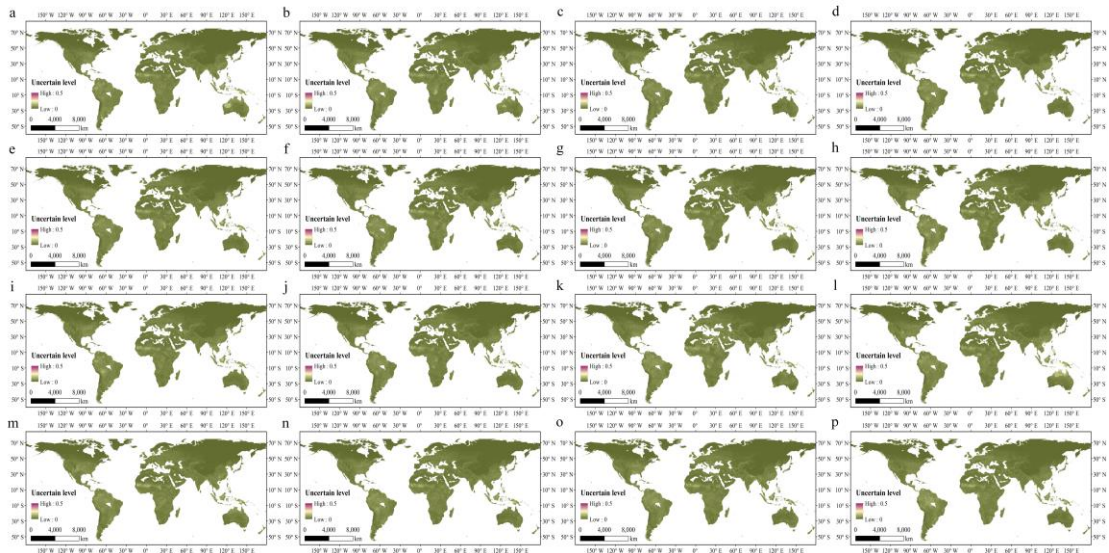

182

183

**Supplementary Figure 27. Maps of uncertainty associated with these simulations derived from 20 ensemble BRT models trained on all onset samples under strategy b.**

184

185

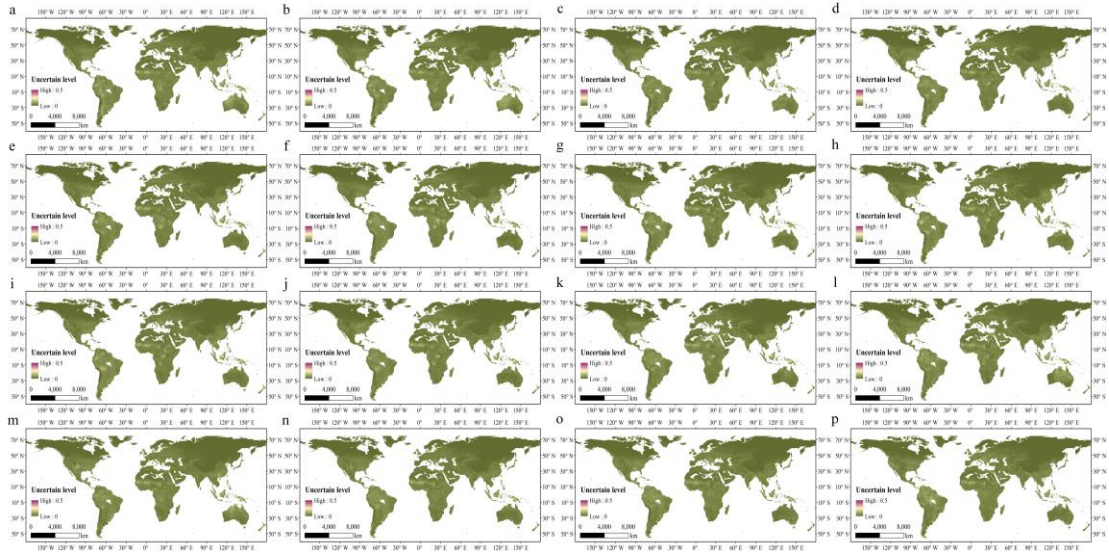

186

187 **Supplementary Figure 28. Maps of uncertainty associated with these simulations derived**  
 188 **from 20 ensemble BRT models trained on all onset samples under strategy b+.**

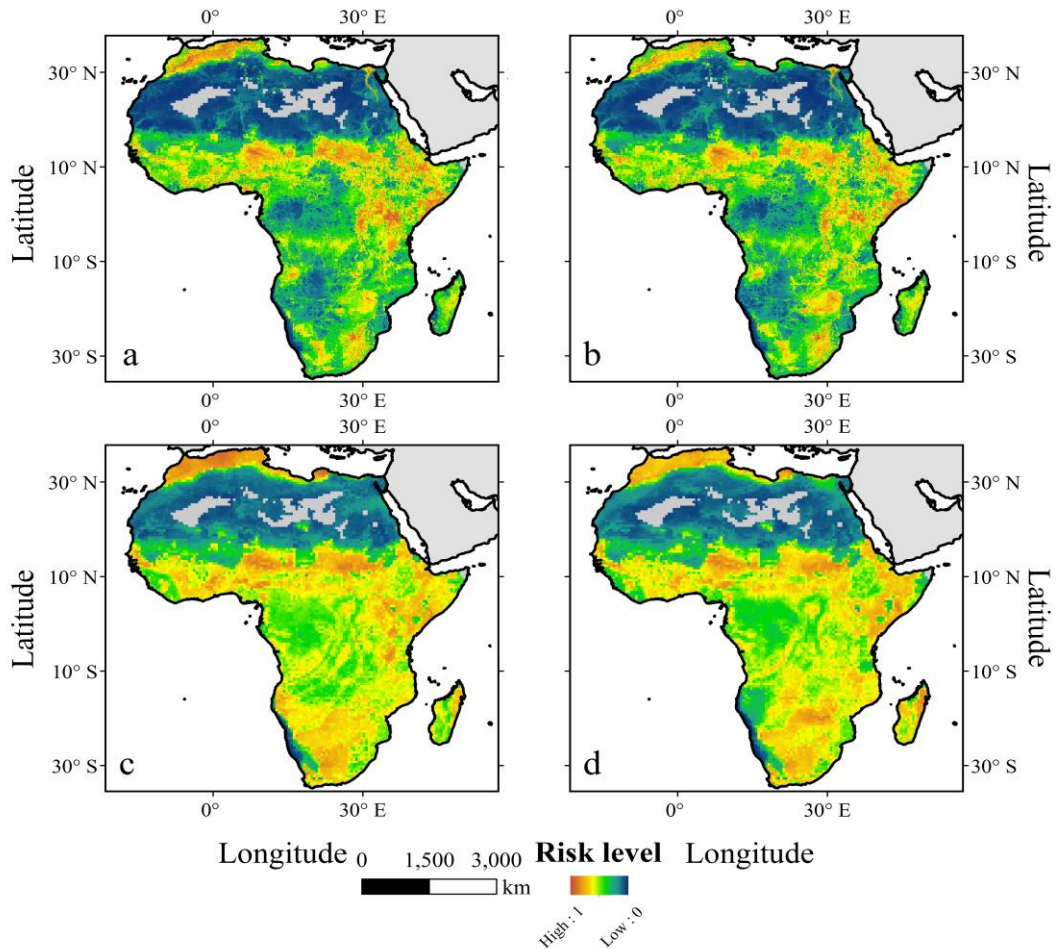

189

190 **Supplementary Figure 29. Maps of the simulated risk of armed conflict incidence in Africa**  
 191 **in 2018 are generated from 20 ensemble BRT models fitted from full incidence samples**  
 192 **under strategies (a) a, (b) a+, (c) b, and (d) b+. The simulated risk level ranges from 0 (blue) to**  
 193 **1 (red), and the grey part denotes the areas with insufficient data.**

194 **Supplementary Tables**

195 **Supplementary Table 1. The performance of the 20 ensemble BRT models trained on one-year**  
 196 **incidence samples during time-cross validation process.**

| Performance | Strategy a |                    | Strategy a+ |                    | Strategy b |                    | Strategy b+ |                    |
|-------------|------------|--------------------|-------------|--------------------|------------|--------------------|-------------|--------------------|
|             | Mean       | Standard Deviation | Mean        | Standard Deviation | Mean       | Standard Deviation | Mean        | Standard Deviation |
| ROC-AUC     | 0.878      | 0.038              | 0.886       | 0.039              | 0.784      | 0.062              | 0.798       | 0.061              |
| PR-AUC      | 0.851      | 0.048              | 0.860       | 0.049              | 0.731      | 0.078              | 0.751       | 0.077              |
| F1-score    | 0.756      | 0.076              | 0.767       | 0.078              | 0.638      | 0.105              | 0.657       | 0.105              |

197  
 198 **Supplementary Table 2. The performance of the 20 ensemble BRT models trained on one-year**  
 199 **onset samples during time-cross validation process.**

| Performance | Strategy a |                    | Strategy a+ |                    | Strategy b |                    | Strategy b+ |                    |
|-------------|------------|--------------------|-------------|--------------------|------------|--------------------|-------------|--------------------|
|             | Mean       | Standard Deviation | Mean        | Standard Deviation | Mean       | Standard Deviation | Mean        | Standard Deviation |
| ROC-AUC     | 0.873      | 0.036              | 0.880       | 0.035              | 0.785      | 0.056              | 0.798       | 0.054              |
| PR-AUC      | 0.842      | 0.045              | 0.851       | 0.044              | 0.731      | 0.071              | 0.749       | 0.068              |
| F1-score    | 0.762      | 0.067              | 0.771       | 0.066              | 0.661      | 0.090              | 0.677       | 0.086              |

200  
 201 **Supplementary Table 3. The performance of the 20 ensemble BRT models trained on all**  
 202 **incidence samples under different strategies.**

| Performance | Strategy a |                    | Strategy a+ |                    | Strategy b |                    | Strategy b+ |                    |
|-------------|------------|--------------------|-------------|--------------------|------------|--------------------|-------------|--------------------|
|             | Mean       | Standard Deviation | Mean        | Standard Deviation | Mean       | Standard Deviation | Mean        | Standard Deviation |
| ROC-AUC     | 0.937      | 0.001              | 0.939       | 0.002              | 0.886      | 0.003              | 0.891       | 0.002              |
| PR-AUC      | 0.935      | 0.002              | 0.937       | 0.002              | 0.880      | 0.003              | 0.887       | 0.002              |
| F1-score    | 0.879      | 0.002              | 0.882       | 0.002              | 0.827      | 0.003              | 0.830       | 0.003              |

203  
 204 **Supplementary Table 4. The performance of the 20 ensemble BRT models trained on all onset**  
 205 **samples under different strategies.**

| Performance | Strategy a |                    | Strategy a+ |                    | Strategy b |                    | Strategy b+ |                    |
|-------------|------------|--------------------|-------------|--------------------|------------|--------------------|-------------|--------------------|
|             | Mean       | Standard Deviation | Mean        | Standard Deviation | Mean       | Standard Deviation | Mean        | Standard Deviation |
| ROC-AUC     | 0.927      | 0.002              | 0.928       | 0.002              | 0.868      | 0.004              | 0.874       | 0.004              |
| PR-AUC      | 0.926      | 0.002              | 0.928       | 0.002              | 0.862      | 0.004              | 0.869       | 0.004              |
| F1-score    | 0.872      | 0.002              | 0.874       | 0.002              | 0.820      | 0.004              | 0.823       | 0.004              |

206  
 207

208 **Supplementary Table 5. The significant differences that were observed for the ROC-AUC**  
 209 **performance of the 20 ensemble BRT models trained on all incidence samples under different**  
 210 **strategies.**

| Strategy | a             | a+            | b            | b+ |
|----------|---------------|---------------|--------------|----|
| a        | —             | —             | —            | —  |
| a+       | 9.804E-5 ***  | —             | —            | —  |
| b        | 1.451E-11 *** | 1.451E-11 *** | —            | —  |
| b+       | 6.786E-8 ***  | 6.786E-8 ***  | 4.535E-6 *** | —  |

211 Note: \* indicates  $p < 0.05$ ; \*\* indicates  $p < 0.01$ ; \*\*\* indicates  $p < 0.001$ ; NS indicates not significant; The  $p$  values  
 212 were determined by two-tailed Mann–Whitney test, representing a comparison among strategies.

213  
 214  
 215

216 **Supplementary Table 6. The significant differences that were observed for the ROC-AUC**  
 217 **performance of the 20 ensemble BRT models trained on all onset samples under different**  
 218 **strategies.**

| Strategy | a             | a+           | b            | b+ |
|----------|---------------|--------------|--------------|----|
| a        | —             | —            | —            | —  |
| a+       | 0.015 *       | —            | —            | —  |
| b        | 1.451E-11 *** | 6.786E-8 *** | —            | —  |
| b+       | 1.451E-11 *** | 6.786E-8 *** | 2.898E-5 *** | —  |

219 Note: \* indicates  $p < 0.05$ ; \*\* indicates  $p < 0.01$ ; \*\*\* indicates  $p < 0.001$ ; NS indicates not significant; The  $p$  values  
 220 were determined by two-tailed Mann–Whitney test, representing a comparison among strategies.

221  
 222

223 **Supplementary Table 7. The relative contribution of covariates in simulating the global risk**  
 224 **of armed conflict incidence based on the 20 ensemble BRT models trained on all incidence**  
 225 **samples from period 2000-2015 under strategies a and a+.**

| Variables                                          | Relative contribution $\pm$ Standard Deviation, % |                    |
|----------------------------------------------------|---------------------------------------------------|--------------------|
|                                                    | Strategy a                                        | Strategy a+        |
| Stable background covariates <sup>†</sup>          | 97.486                                            | 96.194             |
| Mean temperature                                   | 46.493 $\pm$ 1.187                                | 45.944 $\pm$ 1.171 |
| Natural disaster hotspots                          | 15.925 $\pm$ 0.725                                | 15.706 $\pm$ 0.753 |
| Mean precipitation                                 | 10.609 $\pm$ 0.885                                | 10.545 $\pm$ 0.831 |
| Urban accessibility                                | 9.758 $\pm$ 0.667                                 | 9.684 $\pm$ 0.648  |
| Elevation                                          | 5.900 $\pm$ 0.342                                 | 5.578 $\pm$ 0.293  |
| Nighttime lights                                   | 3.150 $\pm$ 0.166                                 | 3.207 $\pm$ 0.197  |
| Ethnic diversity                                   | 2.889 $\pm$ 0.191                                 | 2.835 $\pm$ 0.189  |
| Normalized difference vegetation index             | 2.762 $\pm$ 0.197                                 | 2.695 $\pm$ 0.190  |
| Climate deviations related covariates <sup>†</sup> | 2.514                                             | 3.806              |
| Standardized temperature index                     | 1.720 $\pm$ 0.167                                 | 2.508 $\pm$ 0.231  |
| Standardized precipitation index                   | 0.794 $\pm$ 0.090                                 | 1.298 $\pm$ 0.133  |

226 Note: <sup>†</sup>Sum of relative contribution for both categories.

227 **Supplementary Table 8. The relative contribution of covariates in simulating the global risk**  
 228 **of armed conflict onset based on the 20 ensemble BRT models trained on all onset samples**  
 229 **from period 2000-2015 under strategies a and a+.**

| Variables                              | Relative contribution $\pm$ Standard Deviation, % |                    |
|----------------------------------------|---------------------------------------------------|--------------------|
|                                        | Strategy a                                        | Strategy a+        |
| Stable background covariates†          | 96.894                                            | 96.067             |
| Mean temperature                       | 47.763 $\pm$ 1.667                                | 47.158 $\pm$ 1.589 |
| Natural disaster hotspots              | 14.267 $\pm$ 1.239                                | 14.037 $\pm$ 1.206 |
| Mean precipitation                     | 10.896 $\pm$ 1.052                                | 10.902 $\pm$ 1.057 |
| Urban accessibility                    | 9.901 $\pm$ 0.933                                 | 9.830 $\pm$ 0.928  |
| Elevation                              | 5.587 $\pm$ 0.370                                 | 5.293 $\pm$ 0.360  |
| Ethnic diversity                       | 3.093 $\pm$ 0.240                                 | 3.045 $\pm$ 0.214  |
| Nighttime lights                       | 2.815 $\pm$ 0.239                                 | 2.846 $\pm$ 0.244  |
| Normalized difference vegetation index | 2.572 $\pm$ 0.284                                 | 2.557 $\pm$ 0.272  |
| Climate deviations related covariates† | 3.106                                             | 4.331              |
| Standardized temperature index         | 2.233 $\pm$ 0.314                                 | 2.955 $\pm$ 0.341  |
| Standardized precipitation index       | 0.873 $\pm$ 0.092                                 | 1.376 $\pm$ 0.153  |

230 Note: †Sum of relative contribution for both categories.

## 231 **Supplementary Notes**

### 232 **Dependent Variable**

233 Data on armed conflict is taken from the openly available Uppsala Conflict Data Program (UCDP)  
234 georeferenced event dataset (GED). The UCDP GED is an armed conflict event dataset that includes  
235 state-based conflict, non-state conflict, and one-sided violence, and each armed conflict event is  
236 defined as: “an incident where armed force was used by an organised actor against another organized  
237 actor, or against civilians, resulting in at least 1 direct death at a specific location and a specific date”

238 <sup>1</sup>. In order to alleviate the well-known media bias, UCDP GED does not rely solely on media reports,  
239 but also on NGO reports, case studies, databases and historical archives. In addition, triple-checked  
240 was employed to improve the quality of the final dataset. In contrast to most other event datasets,  
241 the quality of UCDP GED’s geocoding and precision information is much better <sup>2</sup>, which is  
242 particularly important for us to analyze geographic dimensions of armed conflict. Therefore, UCDP  
243 GED was adopted in the present study. Based on UCDP GED, we aggregate armed conflict events  
244 to the grid-year level and code two binary dependent variables (armed conflict incidence and armed  
245 conflict onset) to represent the risk of armed conflict. The two indicators are coded using the  
246 following equation [1] and [2] <sup>3</sup>:

$$247 \quad \text{Armed conflict incidence} = \begin{cases} 1 & \text{if armed conflict event in year } t \\ 0 & \text{if no armed conflict event in year } t \end{cases} \quad [1]$$

$$248 \quad \text{Armed conflict onset} = \begin{cases} 1 & \text{if armed conflict event in year } t \text{ but not in year } t-1 \\ 0 & \text{if no armed conflict event in year } t \text{ and year } t-1 \end{cases} \quad [2]$$

## 249 **Independent Variable**

250 Previous studies have linked conflict risk to a series of covariates <sup>4, 5</sup>. For instance, politically  
251 relevant ethnic diversity might play a prominent role in conflict-prone regions, particularly in Africa  
252 and Asia, thus serving as a predetermined conflict line <sup>6</sup>. In addition, climate change could worsen  
253 instability in volatile regions, especially in Africa <sup>7, 8, 9</sup>. In the past decades, some interdisciplinary  
254 groups of scientists adopted various covariates to understand conflict risk and predict the risk of  
255 armed conflict; these primarily focused on a single country or region scale <sup>10, 11, 12</sup>. However, the  
256 grid-year level ( $0.1^\circ \times 0.1^\circ$ ) prediction exercise at the global scale remains a huge challenge due to  
257 the complexity of the causal linkages and the availability of high-quality data. With an increasing  
258 number of various kinds of data and the further development of machine learning approaches,  
259 quantifying the causal effect of the climate-conflict link and making the grid-year level ( $0.1^\circ \times 0.1^\circ$ )  
260 prediction at the global scale have become possible. Considering the availability of data, several  
261 global fine-scale datasets described in Methods section were used to generate the candidate  
262 independent variables. The candidate independent variables adopted in the present study were  
263 divided into two categories: climate deviation related factors and stable background contexts.  
264 Climate deviation related factors included: (a) Standardized temperature index (One-year or Two-  
265 year); (b) Standardized precipitation index (One-year or Two-year). Stable background contexts  
266 included: (a) Mean temperature; (b) Mean precipitation; (c) Elevation; (d) Natural disaster hotspots;  
267 (e) Ethnic diversity; (f) Urban accessibility; (g) Nighttime lights; (h) Normalized difference  
268 vegetation index. The list of independent variables and statistical tests under different modelling  
269 strategies are detailed in chapters Modelling Strategy and Statistical Test respectively.



## 270 **Supplementary Methods**

### 271 **Boosted Regression Trees**

272 A comprehensive comparison of 16 modelling methods conducted by Elith et al. (2006)<sup>13</sup> revealed  
273 that boosted regression trees (BRT) and maximum entropy mode (Maxent) performed better than  
274 other modelling methods. Whilst broadly comparable, BRT tend to out-perform Maxent at capturing  
275 the complex relationships based on a large amount of data. Thus, BRT modelling framework was  
276 adopted in the present study.

277 The BRT model can be described using the following functional forms [3] and [4]:

$$278 \quad f_t(X) = f_{t-1}(X) + \lambda \cdot \rho_t h(X; a_t) \quad \lambda \in (0,1) \quad [3]$$

$$279 \quad L(y, f(X)) = \log(1 + \exp(-2yf(X))) \quad [4]$$

280 where  $X = \{x_1, x_2, \dots, x_n\}$  represents stable background contexts and climate deviations related  
281 covariates,  $y$  is armed conflict incidence or armed conflict onset,  $f_t(X)$  refers to the estimated  
282 mapping function from  $X$  to  $y$  during the  $t$ -th iteration process,  $\lambda$  is the learning-rate  
283 parameter,  $\rho_t$  is the weight parameter,  $h(X; a_t)$  is the function of an individual tree, and  $a_t$   
284 defines the split variables. During the modelling process, the parameters  $\rho_t$  and  $a_t$  were  
285 estimated by minimizing a binomial loss function (equation [4]).

286 In the present study, the R version 3.3.3 64-bit statistical computing platform was combined with  
287 the extension packages (i.e., dismo and gbm) to build BRT modelling framework and assess the  
288 performance. To enhance the robustness of simulation, we created an ensemble of 20 BRT models  
289 to generate the risk map of armed conflict using the mean method. Area under the receiver operator  
290 characteristic curve (ROC-AUC)<sup>14, 15, 16</sup>, area under the precision recall curves (PR-AUC) and F1-

291 score <sup>11</sup> were adopted as accuracy evaluation indexes.

## 292 **BRT Parameter Selection**

293 The following parameters are required to be determined during usage of BRT modelling framework:

294 a) the complexity of individual trees (tree.complexity); b) the weight applied to individual trees

295 (learning.rate); c) the proportion of observations used in selecting variables (bag.fraction); d)

296 numbers of trees to add at each cycle (step.size); e) the number of folds cross-validation (cv.folds);

297 f) max number of trees to fit before stopping (max.trees). For parameters a-f, we follow Bhatt et al.

298 (2013) <sup>17</sup> in setting tree.complexity equal to 4, learning.rate equal to 0.01, bag.fraction equal to 0.75,

299 step.size equal to 10, cv.folds equal to 10 and max.trees equal to 10000. In addition, it should be

300 noted that specifying the optimal number of trees plays an important role during the BRT modelling

301 process. In the present study, the methods of Elith et al. (2008) <sup>18</sup> was combined with 10-fold cross

302 validation process to determine the optimal number of trees. Other parameters were held at their

303 default values.

## 304 **Modelling Strategy**

305 In the present study, four modelling strategies (named strategies a, a+, b, b+, respectively) are

306 designed to construct the dimensional information of samples. The detailed covariates adopted in

307 the four modelling strategies are shown in Supplementary Table 9. The modelling process involves

308 two stages, as shown in Supplementary Fig. 1. In the first stage, 20 ensemble BRT models trained

309 on one-year incidence samples or one-year onset samples under four strategies are combined with

310 time-cross validation method to prove the hypothesis that the patterns between conflict risk and

311 high-dimensional covariates exist. In the second stage, the samples from 2000 to 2015 are merged

312 to form a larger sample, and the ensemble BRT models are trained on all incidence samples or all  
 313 onset samples to avoid the models skew to the single-year sample. It should be noted that we also  
 314 need to perform rigorous statistical tests on the data. The details of statistical tests are shown in the  
 315 following section.

316 **Supplementary Table 9. The stable background contexts and climate deviation related**  
 317 **covariates adopted in the four modelling strategies.**

| Categories                                  | Strategy a                             | Strategy a+           | Strategy b            | Strategy b+           |
|---------------------------------------------|----------------------------------------|-----------------------|-----------------------|-----------------------|
| Stable<br>background<br>contexts            | Mean temperature                       |                       |                       |                       |
|                                             | Natural disaster hotspots              |                       |                       | Mean temperature      |
|                                             | Mean precipitation                     |                       |                       |                       |
|                                             | Urban accessibility                    |                       |                       |                       |
|                                             | Elevation                              |                       |                       |                       |
|                                             | Nighttime lights                       |                       |                       | Mean precipitation    |
|                                             | Ethnic diversity                       |                       |                       |                       |
| Climate<br>deviations related<br>covariates | Normalized difference vegetation index |                       |                       |                       |
|                                             | One-year standardized                  | Two-year standardized | One-year standardized | Two-year standardized |
|                                             | temperature index                      | temperature index     | temperature index     | temperature index     |
|                                             | One-year standardized                  | Two-year standardized | One-year standardized | Two-year standardized |
|                                             | precipitation index                    | precipitation index   | precipitation index   | precipitation index   |

## 318 **Statistical Test**

319 If there is multicollinearity between covariate variables, unstable parameter estimates or other  
 320 problems will decrease the credibility of the results revealed by the BRT model <sup>19</sup>. For the  
 321 collinearity test, the correlation matrix and variance inflation factor (VIF) were calculated during  
 322 two modelling processes. In the first stage, one-year incidence samples (2000) and one-year onset  
 323 samples (2000) used in the first simulation process under four strategies are adopted to estimate  
 324 correlation matrix and VIF, as shown in Supplementary Tables 10-17. In the second stage, all  
 325 incidence samples and all onset samples under four strategies are adopted to estimate the correlation  
 326 matrix and VIF, as shown in Supplementary Tables 18-25. Generally, these results illustrate that

327 multicollinearity is unlikely to affect our analysis.

328 **Supplementary Table 10. Correlation matrix between covariate variables used in BRT**  
 329 **ensembles trained on one-year (2000) incidence samples under strategy a.**

|      | SPI    | STI    | E      | NTL    | UA     | ED     | NDH    | MP     | MT     | NDVI   |
|------|--------|--------|--------|--------|--------|--------|--------|--------|--------|--------|
| SPI  | 1      | -0.304 | -0.129 | -0.053 | 0.087  | -0.005 | 0.065  | 0.266  | 0.049  | 0.163  |
| STI  | -0.304 | 1      | 0.11   | -0.059 | -0.013 | 0.079  | -0.053 | -0.343 | -0.031 | -0.185 |
| E    | -0.129 | 0.11   | 1      | -0.097 | 0.094  | 0.092  | 0.022  | -0.135 | -0.16  | -0.169 |
| NTL  | -0.053 | -0.059 | -0.097 | 1      | -0.171 | 0.107  | 0.008  | 0.007  | 0.105  | 0.046  |
| UA   | 0.087  | -0.013 | 0.094  | -0.171 | 1      | -0.295 | -0.127 | -0.184 | -0.499 | -0.36  |
| ED   | -0.005 | 0.079  | 0.092  | 0.107  | -0.295 | 1      | 0.096  | 0.134  | 0.232  | 0.206  |
| NDH  | 0.065  | -0.053 | 0.022  | 0.008  | -0.127 | 0.096  | 1      | 0.244  | 0.147  | 0.13   |
| MP   | 0.266  | -0.343 | -0.135 | 0.007  | -0.184 | 0.134  | 0.244  | 1      | 0.487  | 0.7    |
| MT   | 0.049  | -0.031 | -0.16  | 0.105  | -0.499 | 0.232  | 0.147  | 0.487  | 1      | 0.483  |
| NDVI | 0.163  | -0.185 | -0.169 | 0.046  | -0.36  | 0.206  | 0.13   | 0.7    | 0.483  | 1      |

330 Note: SPI (Standardized precipitation index): VIF = 1.175; STI (Standardized temperature index): VIF = 1.260; E  
 331 (Elevation): VIF = 1.091; NTL (Nighttime lights): VIF = 1.057; UA (Urban accessibility): VIF = 1.546; ED  
 332 (Ethnic diversity): VIF = 1.161; NDH (Natural disaster hotspots) : VIF = 1.087; MP (Mean precipitation) : VIF =  
 333 2.607; MT (Mean temperature) : VIF = 1.768; NDVI (normalized difference vegetation index) : VIF = 2.273.

334

335 **Supplementary Table 11. Correlation matrix between covariate variables used in BRT**  
 336 **ensembles trained on one-year (2000) incidence samples under strategy a+.**

|      | SPI    | STI    | E      | NTL    | UA     | ED     | NDH    | MP     | MT     | NDVI   |
|------|--------|--------|--------|--------|--------|--------|--------|--------|--------|--------|
| SPI  | 1      | -0.384 | -0.137 | -0.059 | 0.043  | 0.006  | 0.084  | 0.363  | 0.16   | 0.223  |
| STI  | -0.384 | 1      | 0.149  | 0.002  | -0.069 | 0.139  | 0.059  | -0.333 | -0.043 | -0.232 |
| E    | -0.137 | 0.149  | 1      | -0.097 | 0.094  | 0.092  | 0.022  | -0.135 | -0.16  | -0.169 |
| NTL  | -0.059 | 0.002  | -0.097 | 1      | -0.171 | 0.107  | 0.008  | 0.007  | 0.105  | 0.046  |
| UA   | 0.043  | -0.069 | 0.094  | -0.171 | 1      | -0.295 | -0.127 | -0.184 | -0.499 | -0.36  |
| ED   | 0.006  | 0.139  | 0.092  | 0.107  | -0.295 | 1      | 0.096  | 0.134  | 0.232  | 0.206  |
| NDH  | 0.084  | 0.059  | 0.022  | 0.008  | -0.127 | 0.096  | 1      | 0.244  | 0.147  | 0.13   |
| MP   | 0.363  | -0.333 | -0.135 | 0.007  | -0.184 | 0.134  | 0.244  | 1      | 0.487  | 0.7    |
| MT   | 0.16   | -0.043 | -0.16  | 0.105  | -0.499 | 0.232  | 0.147  | 0.487  | 1      | 0.483  |
| NDVI | 0.223  | -0.232 | -0.169 | 0.046  | -0.36  | 0.206  | 0.13   | 0.7    | 0.483  | 1      |

337 Note: SPI (Standardized precipitation index): VIF = 1.299; STI (Standardized temperature index): VIF = 1.342; E  
 338 (Elevation): VIF = 1.092; NTL (Nighttime lights): VIF = 1.051; UA (Urban accessibility): VIF = 1.544; ED  
 339 (Ethnic diversity): VIF = 1.176; NDH (Natural disaster hotspots): VIF = 1.107; MP (Mean precipitation): VIF =  
 340 2.567; MT (Mean temperature): VIF = 1.755; NDVI (normalized difference vegetation index): VIF = 2.275.

341

342 **Supplementary Table 12. Correlation matrix between covariate variables used in BRT**  
 343 **ensembles trained on one-year (2000) incidence samples under strategy b.**

|     | SPI    | STI    | MP     | MT     |
|-----|--------|--------|--------|--------|
| SPI | 1      | -0.304 | 0.266  | 0.049  |
| STI | -0.304 | 1      | -0.343 | -0.031 |

|    |       |        |       |       |
|----|-------|--------|-------|-------|
| MP | 0.266 | -0.343 | 1     | 0.487 |
| MT | 0.049 | -0.031 | 0.487 | 1     |

344 Note: SPI (Standardized precipitation index): VIF = 1.143; STI (Standardized temperature index): VIF = 1.226;  
345 MP (Mean precipitation): VIF = 1.579; MT (Mean temperature): VIF = 1.352.

346

347 **Supplementary Table 13. Correlation matrix between covariate variables used in BRT**  
348 **ensembles trained on one-year (2000) incidence samples under strategy b+.**

|     | SPI    | STI    | MP     | MT     |
|-----|--------|--------|--------|--------|
| SPI | 1      | -0.384 | 0.363  | 0.16   |
| STI | -0.384 | 1      | -0.333 | -0.043 |
| MP  | 0.363  | -0.333 | 1      | 0.487  |
| MT  | 0.16   | -0.043 | 0.487  | 1      |

349 Note: SPI (Standardized precipitation index): VIF = 1.266; STI (Standardized temperature index): VIF = 1.262;  
350 MP (Mean precipitation): VIF = 1.581; MT (Mean temperature): VIF = 1.339.

351

352 **Supplementary Table 14. Correlation matrix between covariate variables used in BRT**  
353 **ensembles trained on one-year (2000) onset samples under strategy a.**

|      | SPI    | STI    | E      | NTL    | UA     | ED     | NDH    | MP     | MT     | NDVI   |
|------|--------|--------|--------|--------|--------|--------|--------|--------|--------|--------|
| SPI  | 1      | -0.301 | -0.148 | -0.032 | 0.094  | -0.012 | 0.095  | 0.24   | 0.016  | 0.146  |
| STI  | -0.301 | 1      | 0.058  | -0.043 | -0.017 | 0.064  | -0.074 | -0.371 | -0.039 | -0.213 |
| E    | -0.148 | 0.058  | 1      | -0.114 | 0.029  | 0.112  | 0.006  | -0.126 | -0.156 | -0.177 |
| NTL  | -0.032 | -0.043 | -0.114 | 1      | -0.196 | 0.106  | -0.008 | -0.002 | 0.107  | 0.021  |
| UA   | 0.094  | -0.017 | 0.029  | -0.196 | 1      | -0.319 | -0.14  | -0.226 | -0.539 | -0.365 |
| ED   | -0.012 | 0.064  | 0.112  | 0.106  | -0.319 | 1      | 0.137  | 0.129  | 0.212  | 0.193  |
| NDH  | 0.095  | -0.074 | 0.006  | -0.008 | -0.14  | 0.137  | 1      | 0.276  | 0.163  | 0.123  |
| MP   | 0.24   | -0.371 | -0.126 | -0.002 | -0.226 | 0.129  | 0.276  | 1      | 0.495  | 0.703  |
| MT   | 0.016  | -0.039 | -0.156 | 0.107  | -0.539 | 0.212  | 0.163  | 0.495  | 1      | 0.485  |
| NDVI | 0.146  | -0.213 | -0.177 | 0.021  | -0.365 | 0.193  | 0.123  | 0.703  | 0.485  | 1      |

354 Note: SPI (Standardized precipitation index): VIF = 1.170; STI (Standardized temperature index): VIF = 1.280; E  
355 (Elevation): VIF = 1.110; NTL (Nighttime lights): VIF = 1.074; UA (Urban accessibility): VIF = 1.648; ED  
356 (Ethnic diversity): VIF = 1.175; NDH (Natural disaster hotspots) : VIF = 1.125; MP (Mean precipitation) : VIF =  
357 2.673; MT (Mean temperature) : VIF = 1.859; NDVI (normalized difference vegetation index) : VIF = 2.284.

358

359 **Supplementary Table 15. Correlation matrix between covariate variables used in BRT**  
360 **ensembles trained on one-year (2000) onset samples under strategy a+.**

|     | SPI    | STI    | E      | NTL    | UA     | ED     | NDH    | MP     | MT     | NDVI   |
|-----|--------|--------|--------|--------|--------|--------|--------|--------|--------|--------|
| SPI | 1      | -0.396 | -0.131 | -0.071 | 0.054  | -0.007 | 0.131  | 0.364  | 0.137  | 0.23   |
| STI | -0.396 | 1      | 0.084  | 0.036  | -0.094 | 0.113  | 0.047  | -0.348 | -0.057 | -0.264 |
| E   | -0.131 | 0.084  | 1      | -0.114 | 0.029  | 0.112  | 0.006  | -0.126 | -0.156 | -0.177 |
| NTL | -0.071 | 0.036  | -0.114 | 1      | -0.196 | 0.106  | -0.008 | -0.002 | 0.107  | 0.021  |
| UA  | 0.054  | -0.094 | 0.029  | -0.196 | 1      | -0.319 | -0.14  | -0.226 | -0.539 | -0.365 |
| ED  | -0.007 | 0.113  | 0.112  | 0.106  | -0.319 | 1      | 0.137  | 0.129  | 0.212  | 0.193  |
| NDH | 0.131  | 0.047  | 0.006  | -0.008 | -0.14  | 0.137  | 1      | 0.276  | 0.163  | 0.123  |

|      |       |        |        |        |        |       |       |       |       |       |
|------|-------|--------|--------|--------|--------|-------|-------|-------|-------|-------|
| MP   | 0.364 | -0.348 | -0.126 | -0.002 | -0.226 | 0.129 | 0.276 | 1     | 0.495 | 0.703 |
| MT   | 0.137 | -0.057 | -0.156 | 0.107  | -0.539 | 0.212 | 0.163 | 0.495 | 1     | 0.485 |
| NDVI | 0.23  | -0.264 | -0.177 | 0.021  | -0.365 | 0.193 | 0.123 | 0.703 | 0.485 | 1     |

361 Note: SPI (Standardized precipitation index): VIF = 1.317; STI (Standardized temperature index): VIF = 1.356; E  
362 (Elevation): VIF = 1.101; NTL (Nighttime lights): VIF = 1.070; UA (Urban accessibility): VIF = 1.664; ED  
363 (Ethnic diversity): VIF = 1.180; NDH (Natural disaster hotspots): VIF = 1.149; MP (Mean precipitation): VIF =  
364 2.603; MT (Mean temperature): VIF = 1.829; NDVI (normalized difference vegetation index): VIF = 2.301.

365

366 **Supplementary Table 16. Correlation matrix between covariate variables used in BRT**  
367 **ensembles trained on one-year (2000) onset samples under strategy b.**

|     | SPI    | STI    | MP     | MT     |
|-----|--------|--------|--------|--------|
| SPI | 1      | -0.301 | 0.24   | 0.016  |
| STI | -0.301 | 1      | -0.371 | -0.039 |
| MP  | 0.24   | -0.371 | 1      | 0.495  |
| MT  | 0.016  | -0.039 | 0.495  | 1      |

368 Note: SPI (Standardized precipitation index): VIF = 1.131; STI (Standardized temperature index): VIF = 1.258;  
369 MP (Mean precipitation): VIF = 1.630; MT (Mean temperature): VIF = 1.379.

370

371 **Supplementary Table 17. Correlation matrix between covariate variables used in BRT**  
372 **ensembles trained on one-year (2000) onset samples under strategy b+.**

|     | SPI    | STI    | MP     | MT     |
|-----|--------|--------|--------|--------|
| SPI | 1      | -0.396 | 0.364  | 0.137  |
| STI | -0.396 | 1      | -0.348 | -0.057 |
| MP  | 0.364  | -0.348 | 1      | 0.495  |
| MT  | 0.137  | -0.057 | 0.495  | 1      |

373 Note: SPI (Standardized precipitation index): VIF = 1.274; STI (Standardized temperature index): VIF = 1.279;  
374 MP (Mean precipitation): VIF = 1.621; MT (Mean temperature): VIF = 1.352.

375

376 **Supplementary Table 18. Correlation matrix between covariate variables used in BRT**  
377 **ensembles trained on all incidence samples under strategy a.**

|      | SPI    | STI    | E      | NTL    | UA     | ED     | NDH    | MP     | MT     | NDVI   |
|------|--------|--------|--------|--------|--------|--------|--------|--------|--------|--------|
| SPI  | 1      | -0.106 | 0.022  | -0.031 | 0.01   | 0.008  | 0.031  | 0.013  | -0.03  | 0.026  |
| STI  | -0.106 | 1      | 0.01   | -0.023 | -0.037 | -0.043 | -0.005 | -0.012 | 0.216  | 0.031  |
| E    | 0.022  | 0.01   | 1      | -0.108 | 0.06   | 0.111  | 0.002  | -0.153 | -0.155 | -0.201 |
| NTL  | -0.031 | -0.023 | -0.108 | 1      | -0.174 | 0.112  | 0.024  | -0.009 | 0.11   | 0.027  |
| UA   | 0.01   | -0.037 | 0.06   | -0.174 | 1      | -0.285 | -0.126 | -0.138 | -0.494 | -0.261 |
| ED   | 0.008  | -0.043 | 0.111  | 0.112  | -0.285 | 1      | 0.082  | 0.114  | 0.201  | 0.164  |
| NDH  | 0.031  | -0.005 | 0.002  | 0.024  | -0.126 | 0.082  | 1      | 0.266  | 0.159  | 0.149  |
| MP   | 0.013  | -0.012 | -0.153 | -0.009 | -0.138 | 0.114  | 0.266  | 1      | 0.419  | 0.736  |
| MT   | -0.03  | 0.216  | -0.155 | 0.11   | -0.494 | 0.201  | 0.159  | 0.419  | 1      | 0.372  |
| NDVI | 0.026  | 0.031  | -0.201 | 0.027  | -0.261 | 0.164  | 0.149  | 0.736  | 0.372  | 1      |

378 Note: SPI (Standardized precipitation index): VIF = 1.016; STI (Standardized temperature index): VIF = 1.098; E  
379 (Elevation): VIF = 1.099; NTL (Nighttime lights): VIF = 1.055; UA (Urban accessibility): VIF = 1.501; ED (Ethnic

380 diversity): VIF = 1.147; NDH (Natural disaster hotspots) : VIF = 1.100; MP (Mean precipitation) : VIF = 2.591; MT  
 381 (Mean temperature) : VIF = 1.732; NDVI (normalized difference vegetation index) : VIF = 2.399.

382

383

384 **Supplementary Table 19. Correlation matrix between covariate variables used in BRT**  
 385 **ensembles trained on all incidence samples under strategy a+.**

|      | SPI    | STI    | E      | NTL    | UA     | ED     | NDH    | MP     | MT     | NDVI   |
|------|--------|--------|--------|--------|--------|--------|--------|--------|--------|--------|
| SPI  | 1      | -0.093 | 0.017  | -0.046 | 0.02   | 0.004  | 0.044  | 0.043  | -0.022 | 0.051  |
| STI  | -0.093 | 1      | 0.022  | -0.019 | -0.038 | -0.043 | -0.007 | -0.028 | 0.239  | 0.02   |
| E    | 0.017  | 0.022  | 1      | -0.108 | 0.06   | 0.111  | 0.002  | -0.153 | -0.155 | -0.201 |
| NTL  | -0.046 | -0.019 | -0.108 | 1      | -0.174 | 0.112  | 0.024  | -0.009 | 0.11   | 0.027  |
| UA   | 0.02   | -0.038 | 0.06   | -0.174 | 1      | -0.285 | -0.126 | -0.138 | -0.494 | -0.261 |
| ED   | 0.004  | -0.043 | 0.111  | 0.112  | -0.285 | 1      | 0.082  | 0.114  | 0.201  | 0.164  |
| NDH  | 0.044  | -0.007 | 0.002  | 0.024  | -0.126 | 0.082  | 1      | 0.266  | 0.159  | 0.149  |
| MP   | 0.043  | -0.028 | -0.153 | -0.009 | -0.138 | 0.114  | 0.266  | 1      | 0.419  | 0.736  |
| MT   | -0.022 | 0.239  | -0.155 | 0.11   | -0.494 | 0.201  | 0.159  | 0.419  | 1      | 0.372  |
| NDVI | 0.051  | 0.02   | -0.201 | 0.027  | -0.261 | 0.164  | 0.149  | 0.736  | 0.372  | 1      |

386 Note: SPI (Standardized precipitation index): VIF = 1.017; STI (Standardized temperature index): VIF = 1.122; E  
 387 (Elevation): VIF = 1.101; NTL (Nighttime lights): VIF = 1.056; UA (Urban accessibility): VIF = 1.506; ED  
 388 (Ethnic diversity): VIF = 1.147; NDH (Natural disaster hotspots): VIF = 1.100; MP (Mean precipitation): VIF =  
 389 2.607; MT (Mean temperature): VIF = 1.772; NDVI (normalized difference vegetation index): VIF = 2.402.

390

391 **Supplementary Table 20. Correlation matrix between covariate variables used in BRT**  
 392 **ensembles trained on all incidence samples under strategy b.**

|     | SPI    | STI    | MP     | MT    |
|-----|--------|--------|--------|-------|
| SPI | 1      | -0.106 | 0.013  | -0.03 |
| STI | -0.106 | 1      | -0.012 | 0.216 |
| MP  | 0.013  | -0.012 | 1      | 0.419 |
| MT  | -0.03  | 0.216  | 0.419  | 1     |

393 Note: SPI (Standardized precipitation index): VIF = 1.012; STI (Standardized temperature index): VIF = 1.074;  
 394 MP (Mean precipitation): VIF = 1.229; MT (Mean temperature): VIF = 1.289.

395

396 **Supplementary Table 21. Correlation matrix between covariate variables used in BRT**  
 397 **ensembles trained on all incidence samples under strategy b+.**

|     | SPI    | STI    | MP     | MT     |
|-----|--------|--------|--------|--------|
| SPI | 1      | -0.093 | 0.043  | -0.022 |
| STI | -0.093 | 1      | -0.028 | 0.239  |
| MP  | 0.043  | -0.028 | 1      | 0.419  |
| MT  | -0.022 | 0.239  | 0.419  | 1      |

398 Note: SPI (Standardized precipitation index): VIF = 1.011; STI (Standardized temperature index): VIF = 1.091;  
 399 MP (Mean precipitation): VIF = 1.241; MT (Mean temperature): VIF = 1.313.

400

401 **Supplementary Table 22. Correlation matrix between covariate variables used in BRT**

402

**ensembles trained on all onset samples under strategy a.**

|      | SPI    | STI    | E      | NTL    | UA     | ED     | NDH    | MP     | MT     | NDVI   |
|------|--------|--------|--------|--------|--------|--------|--------|--------|--------|--------|
| SPI  | 1      | -0.092 | 0.005  | -0.027 | 0.013  | 0.012  | 0.03   | 0.006  | -0.025 | 0.035  |
| STI  | -0.092 | 1      | 0.021  | -0.027 | -0.051 | -0.03  | -0.021 | -0.025 | 0.219  | 0.03   |
| E    | 0.005  | 0.021  | 1      | -0.098 | 0.044  | 0.111  | -0.017 | -0.146 | -0.152 | -0.187 |
| NTL  | -0.027 | -0.027 | -0.098 | 1      | -0.178 | 0.096  | 0.022  | -0.003 | 0.099  | 0.029  |
| UA   | 0.013  | -0.051 | 0.044  | -0.178 | 1      | -0.279 | -0.131 | -0.139 | -0.504 | -0.262 |
| ED   | 0.012  | -0.03  | 0.111  | 0.096  | -0.279 | 1      | 0.11   | 0.116  | 0.18   | 0.159  |
| NDH  | 0.03   | -0.021 | -0.017 | 0.022  | -0.131 | 0.11   | 1      | 0.304  | 0.172  | 0.171  |
| MP   | 0.006  | -0.025 | -0.146 | -0.003 | -0.139 | 0.116  | 0.304  | 1      | 0.425  | 0.727  |
| MT   | -0.025 | 0.219  | -0.152 | 0.099  | -0.504 | 0.18   | 0.172  | 0.425  | 1      | 0.376  |
| NDVI | 0.035  | 0.03   | -0.187 | 0.029  | -0.262 | 0.159  | 0.171  | 0.727  | 0.376  | 1      |

403

Note: SPI (Standardized precipitation index): VIF = 1.014; STI (Standardized temperature index): VIF = 1.099; E

404

(Elevation): VIF = 1.089; NTL (Nighttime lights): VIF = 1.050; UA (Urban accessibility): VIF = 1.530; ED

405

(Ethnic diversity): VIF = 1.133; NDH (Natural disaster hotspots) : VIF = 1.129; MP (Mean precipitation) : VIF =

406

2.590; MT (Mean temperature) : VIF = 1.765; NDVI (normalized difference vegetation index) : VIF = 2.339.

407

408

**Supplementary Table 23. Correlation matrix between covariate variables used in BRT**

409

**ensembles trained on all onset samples under strategy a+.**

|      | SPI    | STI    | E      | NTL    | UA     | ED     | NDH    | MP     | MT     | NDVI   |
|------|--------|--------|--------|--------|--------|--------|--------|--------|--------|--------|
| SPI  | 1      | -0.073 | -0.005 | -0.042 | 0.02   | 0.007  | 0.05   | 0.045  | -0.01  | 0.069  |
| STI  | -0.073 | 1      | 0.028  | -0.017 | -0.056 | -0.031 | -0.025 | -0.042 | 0.237  | 0.02   |
| E    | -0.005 | 0.028  | 1      | -0.098 | 0.044  | 0.111  | -0.017 | -0.146 | -0.152 | -0.187 |
| NTL  | -0.042 | -0.017 | -0.098 | 1      | -0.178 | 0.096  | 0.022  | -0.003 | 0.099  | 0.029  |
| UA   | 0.02   | -0.056 | 0.044  | -0.178 | 1      | -0.279 | -0.131 | -0.139 | -0.504 | -0.262 |
| ED   | 0.007  | -0.031 | 0.111  | 0.096  | -0.279 | 1      | 0.11   | 0.116  | 0.18   | 0.159  |
| NDH  | 0.05   | -0.025 | -0.017 | 0.022  | -0.131 | 0.11   | 1      | 0.304  | 0.172  | 0.171  |
| MP   | 0.045  | -0.042 | -0.146 | -0.003 | -0.139 | 0.116  | 0.304  | 1      | 0.425  | 0.727  |
| MT   | -0.01  | 0.237  | -0.152 | 0.099  | -0.504 | 0.18   | 0.172  | 0.425  | 1      | 0.376  |
| NDVI | 0.069  | 0.02   | -0.187 | 0.029  | -0.262 | 0.159  | 0.171  | 0.727  | 0.376  | 1      |

410

Note: SPI (Standardized precipitation index): VIF = 1.016; STI (Standardized temperature index): VIF = 1.119; E

411

(Elevation): VIF = 1.090; NTL (Nighttime lights): VIF = 1.051; UA (Urban accessibility): VIF = 1.533; ED

412

(Ethnic diversity): VIF = 1.133; NDH (Natural disaster hotspots): VIF = 1.130; MP (Mean precipitation): VIF =

413

2.606; MT (Mean temperature): VIF = 1.799; NDVI (normalized difference vegetation index): VIF = 2.344.

414

415

**Supplementary Table 24. Correlation matrix between covariate variables used in BRT**

416

**ensembles trained on all onset samples under strategy b.**

|     | SPI    | STI    | MP     | MT     |
|-----|--------|--------|--------|--------|
| SPI | 1      | -0.092 | 0.006  | -0.025 |
| STI | -0.092 | 1      | -0.025 | 0.219  |
| MP  | 0.006  | -0.025 | 1      | 0.425  |
| MT  | -0.025 | 0.219  | 0.425  | 1      |

417

Note: SPI (Standardized precipitation index): VIF = 1.009; STI (Standardized temperature index): VIF = 1.077;

418

MP (Mean precipitation): VIF = 1.242; MT (Mean temperature): VIF = 1.304.



419

420 **Supplementary Table 25. Correlation matrix between covariate variables used in BRT**  
421 **ensembles trained on all onset samples under strategy b+.**

|     | SPI    | STI    | MP     | MT    |
|-----|--------|--------|--------|-------|
| SPI | 1      | -0.073 | 0.045  | -0.01 |
| STI | -0.073 | 1      | -0.042 | 0.237 |
| MP  | 0.045  | -0.042 | 1      | 0.425 |
| MT  | -0.01  | 0.237  | 0.425  | 1     |

422 Note: SPI (Standardized precipitation index): VIF = 1.007; STI (Standardized temperature index): VIF = 1.093; MP

423 (Mean precipitation): VIF = 1.256; MT (Mean temperature): VIF = 1.326.

## 424 **Supplementary References**

- 425 1. Sundberg R, Melander E. Introducing the UCDP georeferenced event dataset. *Journal of*  
426 *Peace Research* **50**, 523-532 (2013).
- 427 2. Eck, K. In data we trust? A comparison of UCDP GED and ACLED conflict events datasets.  
428 *Cooperation & Conflict* **47**, 124-141 (2012).
- 429 3. Van Weezel S. Economic shocks & civil conflict onset in Sub-Saharan Africa, 1981–2010.  
430 *Defence and Peace Economics* **26**, 153-177 (2015).
- 431 4. Uexkull VN, Croicu M, Fjelde H, Buhaug H. Civil conflict sensitivity to growing-season  
432 drought. *Proceedings of the National Academy of Sciences* **113**, 12391-12396 (2016).
- 433 5. Hsiang SM, Burke M, Miguel E. Quantifying the Influence of Climate on Human Conflict.  
434 *Science* **341**, 1235367 (2013).
- 435 6. Schleussner CF, Donges JF, Donner RV, Schellnhuber HJ. Armed-conflict risks enhanced  
436 by climate-related disasters in ethnically fractionalized countries. *Proceedings of the*  
437 *National Academy of Sciences* **113**, 9216-9221 (2016).
- 438 7. O’Loughlin J, Witmer FD, Linke AM, Laing A, Gettelman A, Dudhia J. Climate variability  
439 and conflict risk in East Africa, 1990–2009. *Proceedings of the National Academy of*  
440 *Sciences* **109**, 18344-18349 (2012).
- 441 8. Burke MB, Miguel E, Satyanath S, Dykema JA, Lobell DB. Warming increases the risk of  
442 civil war in Africa. *Proceedings of the National Academy of Sciences of the United States*  
443 *of America* **106**, 20670-20674 (2009).
- 444 9. Barnaby W. Do nations go to war over water? *Nature* **458**, 282-283 (2009).
- 445 10. O’Loughlin J, Linke AM, Witmer FD. Effects of temperature and precipitation variability  
446 on the risk of violence in sub-Saharan Africa, 1980–2012. *Proceedings of the National*  
447 *Academy of Sciences* **111**, 16712-16717 (2014).
- 448 11. Hegre H, *et al.* ViEWS: A political violence early-warning system. *Journal of Peace*  
449 *Research* **56**, 155-174 (2019).
- 450 12. Bazzi S, Blair R, Blattman C, Dube O, Gudgeon M, Peck R. The Promise and Pitfalls of  
451 Conflict Prediction: Evidence from Colombia and Indonesia. *The Review of Economics and*

- 452            *Statistics*, 1-45 (2021).
- 453    13.    Elith J, *et al.* Novel methods improve prediction of species' distributions from occurrence  
454            data. *Ecography* **29**, 129-151 (2006).
- 455    14.    Ding F, Ge Q, Jiang D, Fu J, Hao M. Understanding the dynamics of terrorism events with  
456            multiple-discipline datasets and machine learning approach. *PloS one* **12**, e0179057 (2017).
- 457    15.    Hao M, Jiang D, Ding F, Fu J, Chen S. Simulating spatio-temporal patterns of terrorism  
458            incidents on the indochina peninsula with GIS and the random forest method. *ISPRS*  
459            *International Journal of Geo-Information* **8**, 133 (2019).
- 460    16.    Messina JP, *et al.* The current and future global distribution and population at risk of dengue.  
461            *Nature microbiology* **4**, 1508-1515 (2019).
- 462    17.    Bhatt S, *et al.* The global distribution and burden of dengue. *Nature* **496**, 504-507 (2013).
- 463    18.    Elith J, Leathwick JR, Hastie T. A working guide to boosted regression trees. *Journal of*  
464            *Animal Ecology* **77**, 802-813 (2008).
- 465    19.    Dormann CF, *et al.* Collinearity: a review of methods to deal with it and a simulation study  
466            evaluating their performance. *Ecography* **36**, 27-46 (2013).
- 467
- 468
